# Supplementary material for: Identification of quantitative trait loci for kernel traits in a wheat cultivar Chuannong16
Source: BMC Genet. 2019 Oct 16;20:77. doi: 10.1186/s12863-019-0782-4 (PMC6796374; doi:10.1186/s12863-019-0782-4)
Supplement: Supplementary file 2 — Additional file 2: Table S1. Correlation coefficients for kernel traits in different environments. [file 12863_2019_782_MOESM2_ESM.xlsx]

## Sheet: Sheet1
Table S1 Correlation coefficients for kernel traits in different environments
kernel length
	2017CZ	2017YA	2018YA	BULP
2017CZ	1
2017YA	0.82**	1
2018YA	0.67**	0.67**	1	1
BLUP	0.92**	0.93**	0.86**
kernel width
	2017CZ	2017YA	2018YA	BULP
2017CZ	1
2017YA	0.57**	1
2018YA	0.38**	0.39**	1
BLUP	0.75**	0.78**	0.85**	1
thousand kernel weight
	2017CZ	2017YA	2018YA	BULP
2017CZ	1
2017YA	0.68**	1
2018YA	0.40**	0.44**	1
BLUP	0.84**	0.83**	0.79**	1
** Correlation is significant at the 0.01 level.
