# Supplementary material for: Identification of quantitative trait loci for kernel traits in a wheat cultivar Chuannong16
Source: BMC Genet. 2019 Oct 16;20:77. doi: 10.1186/s12863-019-0782-4 (PMC6796374; doi:10.1186/s12863-019-0782-4)
Supplement: Supplementary file 4 — Additional file 4: Table S3. Correlation coefficients between agronomic traits and kernel traits in 2CN population. [file 12863_2019_782_MOESM4_ESM.xlsx]

## Sheet: Sheet1
Table S3 Correlation coefficients between agronomic traits and kernel traits in 2CN population
	Spikelet Number Per Spike	Spike Length	Plant Height	Productive Tiller Number	Kernel Number Per Spike	Anthesis Date
KL	-0.39**	0.15*	0.41	0.71	-0.1	-0.55**
KW	-0.46**	-0.09	0.24**	-0.36	-0.13	-0.59**
TKW	-0.45**	0.05	0.12*	-0.73	-0.1	-0.59**
* Correlation is significant at the 0.05 level, ** Correlation is significant at the 0.01 level.
