# Supplementary material for: Identification of quantitative trait loci for kernel traits in a wheat cultivar Chuannong16
Source: BMC Genet. 2019 Oct 16;20:77. doi: 10.1186/s12863-019-0782-4 (PMC6796374; doi:10.1186/s12863-019-0782-4)
Supplement: Supplementary file 5 — Additional file 5: Table S4. Quantitative trait loci detected in the QTL × environment interaction module. [file 12863_2019_782_MOESM5_ESM.xlsx]

## Sheet: sheet
Table S4 Quantitative trait loci detected in the QTL × environment interaction module.
Traits	Chromosome	Position(cM)	LeftMarker	RightMarker	LOD	LOD(A)a	LOD(AbyE)b	PVE(A)c	PVE(AbyE)d	Add_2017CZe	Add_2017YAe	Add_2018YAe	Detected QTLs
KL	1A	169	AX-109558656	AX-111476496	13.3123	11.5891	1.7232	6.1194	0.477	-0.0159	-0.0183	0.0342	QKL.sicau-1A
	1B	34	AX-94801647	AX-110101967	4.9185	3.7552	1.1633	1.9071	0.2049	-0.0215	0.0169	0.0046
	2B	3	AX-108983036	AX-110470689	5.8704	3.3336	2.5368	1.7042	1.9944	-0.0272	0.0695	-0.0423
	2B	53	AX-108890356	AX-109385615	5.4724	2.8249	2.6475	1.4319	0.9923	0.0304	0.0185	-0.0489
	2B	64	AX-110425276	AX-111616168	5.7163	3.9973	1.719	2.0147	1.3183	-0.0509	0.0019	0.049	QKL.sicau-2B
	2D	68	AX-111096297	KASP-AX-94721936	37.6094	34.0326	3.5768	20.109	0.4992	-0.0343	0.0099	0.0244	QKL.sicau-2D
	2D	164	AX-109412860	AX-110573324	5.0307	2.0846	2.9461	1.0575	1.0348	-0.0403	-0.0062	0.0465
	3A	4	AX-111014188	AX-109835639	4.8218	3.4702	1.3516	1.7429	0.9318	-0.0264	-0.0222	0.0485
	3A	85	AX-95661168	AX-110039270	10.5093	8.7804	1.7288	4.5193	0.3708	-0.0185	0.0299	-0.0114
	3B	299	AX-110466933	AX-109925161	3.5845	3.5631	0.0215	1.7085	0.061	0.0106	-0.0111	0.0005
	4A	157	AX-110490227	AX-110030140	9.816	8.0517	1.7644	4.173	1.6239	0.0408	0.0215	-0.0623	QKL.sicau-4A
	5A	1	AX-110670888	AX-94914161	4.0422	3.0729	0.9694	1.5301	0.5316	-0.0003	-0.0313	0.0316
	5A	194	AX-109078558	AX-109369427	3.8275	3.6947	0.1329	1.7781	0.0094	-0.0034	-0.0012	0.0046
	5B	105	AX-110933967	AX-109831962	23.7279	5.7483	17.9796	3.0485	8.2701	-0.1416	0.0879	0.0538
	6A	7	AX-111534875	AX-109303250	6.7767	2.9343	3.8424	1.4664	1.2183	0.052	-0.0414	-0.0106
	6A	74	AX-109875069	AX-111135903	4.4003	3.3677	1.0326	1.7021	0.8353	0.0404	-0.0016	-0.0388
	6A	81	AX-108952456	AX-108813367	3.2374	2.3208	0.9166	1.1671	0.4353	-0.0037	-0.0265	0.0302
	7A	0	AX-109868790	AX-110460191	9.7028	8.6921	1.0107	4.5319	0.8988	0.0125	-0.0455	0.033	QKL.sicau-7A
KW	1A	185	AX-111216460	AX-110610940	3.6694	1.9202	1.7492	2.0025	0.2258	-0.0106	0.0011	0.0095
	2B	59	AX-110066797	AX-110033091	5.1676	3.9737	1.1939	4.0915	0.6743	-0.0182	0.0163	0.0019
	2B	137	AX-108800307	AX-108758158	6.0717	3.0846	2.9871	3.2243	0.4641	0.0154	-0.0023	-0.0132
	2B	235	AX-111449284	AX-94441014	3.4572	2.7586	0.6986	2.8119	0.0633	-0.0011	-0.0047	0.0058
	2D	67	AX-108853005	AX-109836946	11.766	9.8659	1.9002	10.6361	9.2849	0.0594	0.0094	-0.0688	QKW.sicau-2D
	3B	85	AX-108846400	AX-109876826	5.4972	3.0348	2.4624	3.0018	0.3201	0.0137	-0.0055	-0.0082
	3D	65	AX-110987465	AX-110543919	5.4154	5.0688	0.3466	5.1149	1.8611	-0.0288	-0.0001	0.0289	QKW.sicau-3D
	4A	140	AX-94388553	AX-111624503	3.9501	0.1067	3.8434	0.1077	3.3575	0.0227	0.0224	-0.0451
	5A	21	AX-110436209	AX-110644627	3.9793	3.0916	0.8876	3.1841	1.14	0.0261	-0.0135	-0.0126
	5A	44	AX-109959535	AX-111570224	3.7153	1.2513	2.4639	1.2227	0.7714	-0.0194	0.0175	0.0019
	7B	9	AX-109880655	AX-89740247	3.3044	2.9754	0.329	3.1199	2.4485	-0.0171	-0.0208	0.0379
TKW	1A	170	AX-111476496	AX-110466836	4.5739	3.8655	0.7084	2.611	0.4325	-0.0603	0.0448	0.0154	QTKW.sicau-1A
	2B	30	AX-108835134	AX-110403972	3.0412	2.4774	0.5637	1.5675	0.6701	-0.0562	-0.0192	0.0754
	2B	64	AX-110425276	AX-111616168	6.5343	5.8865	0.6478	3.9831	0.4046	0.0546	-0.0514	-0.0031	QTKW.sicau-2B
	2B	162	AX-109430236	AX-111781829	4.9396	3.7681	1.1714	2.5247	0.144	-0.0355	0.0233	0.0122
	2D	68	AX-111096297	KASP-AX-94721936	21.7076	19.2048	2.5028	14.2786	0.2007	-0.0392	0.0348	0.0044	QTKW.sicau-2D
	3B	157	AX-111087588	AX-110971226	3.4605	1.9525	1.508	1.3049	0.2814	0.013	0.0357	-0.0487
	4B	112	AX-109868698	AX-111617938	3.0961	2.9162	0.1798	1.9532	0.0482	0.0044	-0.0199	0.0155
	4B	137	AX-109526283	AX-110549715	3.3091	3.002	0.3072	1.9869	0.0755	0.0228	-0.0236	0.0008
	4B	154	AX-111738217	AX-111068079	3.9728	2.0434	1.9294	1.3468	0.3516	0.0237	0.0325	-0.0562
	4B	177	AX-109503821	AX-110488730	4.9532	4.2449	0.7083	2.6845	0.2411	-0.0392	-0.0024	0.0416
	4B	190	AX-89554870	AX-109074448	3.2074	1.8767	1.3307	1.2322	0.5708	-0.071	0.0262	0.0448
	5A	18	AX-110436209	AX-110644627	3.2057	2.8217	0.384	1.7998	0.6072	-0.0293	0.0736	-0.0443
	5A	33	AX-110413733	AX-110576833	5.0347	3.9306	1.1042	2.5357	0.0669	0.0217	-0.0209	-0.0008
	5A	198	AX-109369427	AX-109919444	3.262	2.5555	0.7064	1.6629	0.0119	0.0013	0.0083	-0.0096
	5B	36	AX-108840379	AX-94755266	3.0587	1.2627	1.796	0.8159	1.6545	-0.1028	-0.0066	0.1095
	7B	35	AX-109352015	AX-109271886	4.0442	3.1276	0.9166	2.0768	1.4098	-0.075	-0.0359	0.1109
