# Supplementary material for: Identification of quantitative trait loci for kernel traits in a wheat cultivar Chuannong16
Source: BMC Genet. 2019 Oct 16;20:77. doi: 10.1186/s12863-019-0782-4 (PMC6796374; doi:10.1186/s12863-019-0782-4)
Supplement: Supplementary file 6 — Additional file 6: Table S5. Comparison of QTL for kernel traits-related genes from different chromosomes identified in this study with those in previous studies. [file 12863_2019_782_MOESM6_ESM.xlsx]

## Sheet: Table S5
Table S5 Comparison of QTL for kernel traits-related genes from different chromosomes identified in this study with those in previous studies

## Sheet: 1A
Triat	Gene/QTL	chromosome arm	left marker information			right marker information			note*	Reference
			chromsome	physical position	ID	chromsome	physical position	ID
Kernel Length	QKl-1A.1	L	1A	487011145	Xmag3489	1A	485210212	wPt-667984		Cui F, Zhao C, Ding A, et al. Construction of an integrative linkage map and QTL mapping of grain yield-related traits using three related wheat RIL populations[J]. Theoretical and applied genetics, 2014, 127(3): 659-675.
	QKl-2A.1	S	1A	59547150	Xwmc522	1A	N	Xksum052		Cui F, Fan X, Chen M, et al. QTL detection for wheat kernel size and quality and the responses of these traits to low nitrogen stress[J]. Theoretical and applied genetics, 2016, 129(3): 469-484.
	QKl.nwafu-1A	L	1A	511452077	wmc312	1A	7226796	cfa2153		Li M , Wang Z , Liang Z , et al. Quantitative Trait Loci Analysis for Kernel-Related Characteristics in Common Wheat ( L.)[J]. Crop Science, 2015, 55(4):1485.
	QKl.ncl-1A.1	S	1A	27273646	Xwmc24	1A	595079803	Xbarc278		Ramya P, Chaubal A, Kulkarni K, et al. QTL mapping of 1000-kernel weight, kernel length, and kernel width in bread wheat (Triticum aestivum L.)[J]. Journal of applied genetics, 2010, 51(4): 421-429.
		S	1A	21638673	XksuE18	1A	125822410	Xbarc120		Yu M, Mao S, Hou D, et al. Analysis of contributors to grain yield in wheat at the individual quantitative trait locus level[J]. Plant Breeding, 2018, 137(1): 35-49.
	Qgl1a	L	1A	323096864	psp3003a	1A	N	psp3003b		Qing-Feng LI, Shou-Cai MA, Wang ZJ, Shi XX, Xiao-Jing BI, et al. (2012) Locating the Quantitative Trait Loci(QTL) of Wheat Yield-related Traits Based on SRAP Markers. Acta Agriculturae Boreali-Sinica 27: 72-79.
	QKl.sdau-1A	L	1A	N	Xsrap21	1A	305662150	Xwmc44		Sun XY, Wu K, Zhao Y, Kong FM, Han GZ, Jiang HM, Huang XJ, Li R-J, Wang HG, Li SS (2008) QTL analysis of kernel shape and weight using recombinant inbred lines in wheat. Euphytica 165:615–624
	QKL.sicau-1A	L	1A	584833912	AX-109558656	1A	581422281	AX-110466836		This study
Thousand-Kernel Weight	QTkw-1A.1	S	1A	13914238	wPt-672089	1A	458275703	wPt-669563		Cui F, Zhao C, Ding A, et al. Construction of an integrative linkage map and QTL mapping of grain yield-related traits using three related wheat RIL populations[J]. Theoretical and applied genetics, 2014, 127(3): 659-675.
	QTkw.nwafu-1A	L	1A	511452077	wmc312	1A	7226796	cfa2153		Li M , Wang Z , Liang Z , et al. Quantitative Trait Loci Analysis for Kernel-Related Characteristics in Common Wheat ( L.)[J]. Crop Science, 2015, 55(4):1485.
	QTkw.ncl-1A.1	S	1A	27273646	Xwmc24	1A	595079803	Xwmc278		Ramya P, Chaubal A, Kulkarni K, et al. QTL mapping of 1000-kernel weight, kernel length, and kernel width in bread wheat (Triticum aestivum L.)[J]. Journal of applied genetics, 2010, 51(4): 421-429.
		S	1A	33207586	Xbarc119	1A	511452077	Xwmc312		Williams K , Sorrells M E . Three-Dimensional Seed Size and Shape QTL in Hexaploid Wheat ( L.) Populations[J]. Crop Science, 2014, 54(1):98.
	QTgw.nfcri-1A	S	1A	202161912	xgwm357	1A	278853427	xbarc350		Wang R X, Hai L, Zhang X Y, et al. QTL mapping for grain filling rate and yield-related traits in RILs of the Chinese winter wheat population Heshangmai× Yu8679[J]. Theoretical and Applied Genetics, 2009, 118(2): 313-325.
	Qtkw1A.1	L	1A	478424741	wPt-665250	1A	478424741	wPt-731190		Zhang X, Deng Z, Wang Y, Li J, Tian J (2014) Unconditional and conditional QTL analysis of kernel weight related traits in wheat (Triticum aestivum L.) in multiple genetic backgrounds. Genetica 142: 371-379.
	Qtgw1A	S	1A	150896851	gdm33	1A	323096864	psp3003a		Qing-Feng LI, Shou-Cai MA, Wang ZJ, Shi XX, Xiao-Jing BI, et al. (2012) Locating the Quantitative Trait Loci(QTL) of Wheat Yield-related Traits Based on SRAP Markers. Acta Agriculturae Boreali-Sinica 27: 72-79.
	QTKW.sicau-1A	L	1A	584833912	AX-109558656	1A	581422281	AX-110466836		This study
N: information could not be found.

## Sheet: 2B
Triat	Gene/QTL	chromosome arm	left marker information			right marker information			note*	Reference
			chromsome	physical position	ID	chromsome	physical position	ID
Kernel Length	QKl-2B.1	L	2B	784343192	Xwmc317	2B	N	Xcau4.1		Cui F, Zhao C, Ding A, et al. Construction of an integrative linkage map and QTL mapping of grain yield-related traits using three related wheat RIL populations[J]. Theoretical and applied genetics, 2014, 127(3): 659-675.
	QGl.cau-2B.2	L	2B	717821187	wsnp_Ex_c11748_18884081	2B	703976008	BS00065136_51		Zhai H , Feng Z , Du X , et al. A novel allele of TaGW2-A1 is located in a finely mapped QTL that increases grain weight but decreases grain number in wheat (Triticum aestivum L.)[J]. Theoretical and Applied Genetics, 2017.
	QGl.cau-2B.3	L	2B	439769990	xbarc138	2B	713675765	Excalibur_c80601_83
	QKl.ncl-2B.1	L	2B	784343192	Xwmc317	2B	793027358	Xbarc159		Ramya P, Chaubal A, Kulkarni K, et al. QTL mapping of 1000-kernel weight, kernel length, and kernel width in bread wheat (Triticum aestivum L.)[J]. Journal of applied genetics, 2010, 51(4): 421-429.
		L	2B	718351630	Xwmc360	2B			The closest marker	Williams K , Sorrells M E . Three-Dimensional Seed Size and Shape QTL in Hexaploid Wheat ( L.) Populations[J]. Crop Science, 2014, 54(1):98.
		L	2B	556685777	IWB29525	2B	555840884	IWB63790		Mohler V, Albrecht T, Castell A, et al. Considering causal genes in the genetic dissection of kernel traits in common wheat[J]. Journal of applied genetics, 2016, 57(4): 467-476.
		L	2B	393634735	barc160	2B	N	barc377		Manli YU, Zhao L, Guo H, Jiayu GU, Junhui LI, et al. (2014) QTL Mapping for Kernel Traits in Wheat. Journal of Triticeae Crops.
	QGl.ccsu-2B.1	L	2B	583005825	Xwmc179a	2B	604553428	Xwmc500		Tyagi S, Mir RR, Balyan HS, Gupta PK (2015) Interval mapping and meta-QTL analysis of grain traits in common wheat ( Triticum aestivum L.). Euphytica 201: 367-380
	QKl.sdau-2B	L	2B	N	Xsrap1a	2B	615792377	Xgwm120		Sun XY, Wu K, Zhao Y, Kong FM, Han GZ, Jiang HM, Huang XJ, Li R-J, Wang HG, Li SS (2008) QTL analysis of kernel shape and weight using recombinant inbred lines in wheat. Euphytica 165:615–624
	QKL.sicau-2B	S	2B	67466696	AX-110425276	2B	72590135	AX-111616168		This study
Thousand-Kernel Weight	QTkw-2B.3	S	2B	165578541	Xgwm374	2B	3206483	wPt-6223		Cui F, Zhao C, Ding A, et al. Construction of an integrative linkage map and QTL mapping of grain yield-related traits using three related wheat RIL populations[J]. Theoretical and applied genetics, 2014, 127(3): 659-675.
	QTkw.nwafu-2B	S	2B	8228548	wmc764	2B	598064318	wmc441		Li M , Wang Z , Liang Z , et al. Quantitative Trait Loci Analysis for Kernel-Related Characteristics in Common Wheat ( L.)[J]. Crop Science, 2015, 55(4):1485.
	QTkw.ncl-2B.1	S	2B	112537027	Xbarc183	2B	117250201	Xbarc7		Ramya P, Chaubal A, Kulkarni K, et al. QTL mapping of 1000-kernel weight, kernel length, and kernel width in bread wheat (Triticum aestivum L.)[J]. Journal of applied genetics, 2010, 51(4): 421-429.
		S	2B	165578322	Xwmc344	2B	N	Xac14		Heidari B, Sayed-Tabatabaei BE, Saeidi G, Kearsey M, Suenaga K (2011) Mapping QTL for grain yield, yield components, and spike features in a doubled haploid population of bread wheat. Genome 54: 517-527.
	QTgw.nfcri-2B	S	2B	165578541	xgwm374	2B	557367379	xgwm388		Hai L, Guo HJ, Wagner C, Xiao SH (2008) Genomic regions for yield and yield parameters in Chinese winter wheat (Triticum aestivum L.) genotypes tested under varying environments correspond to QTL in widely different wheat materials.PlantSci175:226–232
	QTgw.crc-2B	S	2B	3471690	Xwmc661	2B	73618172	Xgwm429a		Huang XQ, Cloutier S, Lycar L, Radovanovic N, Humphreys DG, et al. (2006) Molecular detection of QTLs for agronomic and quality traits in a doubled haploid population derived from two Canadian wheats (Triticum aestivum L.). Theoretical and Applied Genetics 113: 753-766.
	Qtkw2B	S	2B	N	Xbarc373	2B	272482763	Xbarc1114		Zhang X, Deng Z, Wang Y, Li J, Tian J (2014) Unconditional and conditional QTL analysis of kernel weight related traits in wheat (Triticum aestivum L.) in multiple genetic backgrounds. Genetica 142: 371-379.
		S	2B	112537027	barc183	2B	393634735	barc160		Manli YU, Zhao L, Guo H, Jiayu GU, Junhui LI, et al. (2014) QTL Mapping for Kernel Traits in Wheat. Journal of Triticeae Crops.
			2B	N	Eagc.Mgcg2	2B	N	Eaca.Mcagt5		Zhou M-p, Ren L-j, Zhang X, YU G-h, MA H-x, et al. (2006) Analysis of QTLs for yield traits of wheat. Journal of Triticeae Crops 4
	QTkw.macs-2B	S	2B	73618172	Xgwm429	2B	N	Xubc812.2		Patil R, Tamhankar S, Oak M, Raut A, Honrao B, et al. (2013) Mapping of QTL for agronomic traits and kernel characters in durum wheat (Triticum durum Desf.). Euphytica 190: 117-129
		S	2B	4990816	BCD348	2B			The closest marker	Xue-Jun LI, Li-Qun LI, Wang H, Esorrells M (2008) QTL Mapping for Kernel Weight Using GW3-1 and IND109 Markers in Common Wheat(Triticum aestivum L.). Acta Botanica Boreali-Occidentalia Sinica.
	QTKW.sicau-2B	S	2B	67466696	AX-110425276	2B	72590135	AX-111616168		This study

## Sheet: 2D
Triat	Gene/QTL	chromosome arm	left marker information			right marker information			note*	Reference
			chromsome	physical position	ID	chromsome	physical position	ID
Kernel Length	QKl‑2D.1	L	2D	603539789	wPt-730744	2D	605908263	wPt-730640		Cui F, Zhao C, Ding A, et al. Construction of an integrative linkage map and QTL mapping of grain yield-related traits using three related wheat RIL populations[J]. Theoretical and applied genetics, 2014, 127(3): 659-675.
	QKl‑2D.2	L	2D	573904450	PPO29	2D	N	STS01
	QKl.ncl-2D.1	L	2D	629648566	Xgwm349	2D	642266057	Xcfd161		Ramya P, Chaubal A, Kulkarni K, et al. QTL mapping of 1000-kernel weight, kernel length, and kernel width in bread wheat (Triticum aestivum L.)[J]. Journal of applied genetics, 2010, 51(4): 421-429.
		L	2D	513098578	Xgwm539	2D			Association Mapping	Breseghello F, Sorrells M E. Association mapping of kernel size and milling quality in wheat (Triticum aestivum L.) cultivars[J]. Genetics, 2006, 172(2): 1165-1177.
		S	2D	14362782	Xcfd36	2D	23024744	Xcfd53		Okamoto Y, Nguyen A T, Yoshioka M, et al. Identification of quantitative trait loci controlling grain size and shape in the D genome of synthetic hexaploid wheat lines[J]. Breeding science, 2013, 63(4): 423-429.
		S	2D	80820344	IWB6810	2D	481601603	IWA4789		Mohler V, Albrecht T, Castell A, et al. Considering causal genes in the genetic dissection of kernel traits in common wheat[J]. Journal of applied genetics, 2016, 57(4): 467-476.
	QKl.nwafu-2D.1	L	2D	N	GDM148	2D	48174728	xgwm484		Li M , Wang Z , Liang Z , et al. Quantitative Trait Loci Analysis for Kernel-Related Characteristics in Common Wheat ( L.)[J]. Crop Science, 2015, 55(4):1485.
	QKl.nwafu-2D.2	L	2D	48174728	xgwm484	2D	629648566	xgwm349
	qKL-2D	L	2D	608298294	Xwmc453.1	2D	130832616	Xwmc18		Chen W , Sun D , Yan X , et al. QTL analysis of wheat kernel traits, and genetic effects of qKW-6A on kernel width[J]. Euphytica, 2019, 215(2).
		L	2D	470232616	Xgwm157	2D	513098578	Xgwm539		Manickavelu A, Kawaura K, Imamura H, Mori M, Ogihara Y (2011) Molecular mapping of quantitative trait loci for domestication traits and β-glucan content in a wheat recombinant inbred line population. Euphytica 177: 179-190.
	QKL.sicau-2D	S	2D	32970798	AX-111096297	2D	33735919	KASP-AX-94721936		This study
Kernel Width		S	2D	142336641	Xgwm30	2D			Association Mapping	Breseghello F, Sorrells M E. Association mapping of kernel size and milling quality in wheat (Triticum aestivum L.) cultivars[J]. Genetics, 2006, 172(2): 1165-1177.
		S	2D	14362953	Xwmc111	2D
	QGW	L	2D	593738612	wmc181	2D	N	gs2a		Zhang G, Wang Y, Guo Y, et al. Characterization and mapping of QTLs on chromosome 2D for grain size and yield traits using a mutant line induced by EMS in wheat[J]. The Crop Journal, 2015, 3(2): 135-144.
		S	2D	59311162	cfd62	2D	N	mag4355b
		L	2D	481601603	IWA4789	2D	523150715	IWB53594		Mohler V, Albrecht T, Castell A, et al. Considering causal genes in the genetic dissection of kernel traits in common wheat[J]. Journal of applied genetics, 2016, 57(4): 467-476.
	QKw-2D	L	2D	N	XwmpE08	2D	574603546	Xgpw5215.1		Cui F, Fan X, Chen M, et al. QTL detection for wheat kernel size and quality and the responses of these traits to low nitrogen stress[J]. Theoretical and applied genetics, 2016, 129(3): 469-484.
	qKW-2D	S	2D	19631696	Xwmc503				Additive-effect QTL	Chen W , Sun D , Yan X , et al. QTL analysis of wheat kernel traits, and genetic effects of qKW-6A on kernel width[J]. Euphytica, 2019, 215(2).
	Qgw2D	L	2D	N	Me8Em11b	2D	N	Me8Em11a		Qing-Feng LI, Shou-Cai MA, Wang ZJ, Shi XX, Xiao-Jing BI, et al. (2012) Locating the Quantitative Trait Loci(QTL) of Wheat Yield-related Traits Based on SRAP Markers. Acta Agriculturae Boreali-Sinica 27: 72-79.
	QKW.sicau-2D	S	2D	32970798	AX-111096297	2D	33735919	KASP-AX-94721936		This study
Thousand-Kernel Weight	QTkw‑2D.2	L	2D	608198902	Xmag3596	2D	N	wPt-665317		Cui F, Zhao C, Ding A, et al. Construction of an integrative linkage map and QTL mapping of grain yield-related traits using three related wheat RIL populations[J]. Theoretical and applied genetics, 2014, 127(3): 659-675.
		L	2D	N	UBC815	2D			Association Mapping	Ammiraju J S S, Dholakia B B, Santra D K, et al. Identification of inter simple sequence repeat (ISSR) markers associated with seed size in wheat[J]. Theoretical and Applied Genetics, 2001, 102(5): 726-732.
	QTgw.ipk-2D	L	2D	599941936	Xgdm6	2D			Single-marker regression	Huang X Q, Cöster H, Ganal M W, et al. Advanced backcross QTL analysis for the identification of quantitative trait loci alleles from wild relatives of wheat (Triticum aestivum L.)[J]. Theoretical and Applied Genetics, 2003, 106(8): 1379-1389.
	QTgw.crc-2D.1	L	2D	332519419	wmc601	2D			The closest marker	Cuthbert J L, Somers D J, Brûlé-Babel A L, et al. Molecular mapping of quantitative trait loci for yield and yield components in spring wheat (Triticum aestivum L.)[J]. Theoretical and Applied Genetics, 2008, 117(4): 595-608.
	QTgw.crc-2D.2	L	2D	647509942	gwm382	2D
	QTgw.nfcri-2D	S	2D	115879168	xbarc228	2D	580011701	xcfd168		Wang R X, Hai L, Zhang X Y, et al. QTL mapping for grain filling rate and yield-related traits in RILs of the Chinese winter wheat population Heshangmai× Yu8679[J]. Theoretical and Applied Genetics, 2009, 118(2): 313-325.
	QTGW	L	2D	577440659	wmc41	2D	593738612	wmc181		Zhang G, Wang Y, Guo Y, et al. Characterization and mapping of QTLs on chromosome 2D for grain size and yield traits using a mutant line induced by EMS in wheat[J]. The Crop Journal, 2015, 3(2): 135-144.
		S	2D	59311162	cfd62	2D	N	mag4355b
		S	2D	130832831	Xwmc18	2D			Single-marker regression	Breseghello F, Sorrells M E. QTL analysis of kernel size and shape in two hexaploid wheat mapping populations[J]. Field crops research, 2007, 101(2): 172-179.
	QTkw-2D	L	2D	481601603	IWA4789	2D	523150715	IWB53594		Mohler V, Albrecht T, Castell A, et al. Considering causal genes in the genetic dissection of kernel traits in common wheat[J]. Journal of applied genetics, 2016, 57(4): 467-476.
	QGw.nau-2D	S	2D	19623155	GWM261	2D	23024714	WMC112		Huang Y , Kong Z , Wu X , et al. Characterization of three wheat grain weight QTLs that differentially affect kernel dimensions[J]. Theoretical and Applied Genetics, 2015, 128(12):2437-2445.
	QTkw-2D	L	2D	561157733	Xcfd233	2D	574603546	Xgpw5215.1		Cui F, Fan X, Chen M, et al. QTL detection for wheat kernel size and quality and the responses of these traits to low nitrogen stress[J]. Theoretical and applied genetics, 2016, 129(3): 469-484.
		S	2D	27981473	wPt-666223	2D	38250344	gpw4473		Yu M, Mao S, Hou D, et al. Analysis of contributors to grain yield in wheat at the individual quantitative trait locus level[J]. Plant Breeding, 2018, 137(1): 35-49.
	QTgw.crc-2D	S	2D	17609164	Xgwm296	2D	23024735	Xwmc112		Huang XQ, Cloutier S, Lycar L, Radovanovic N, Humphreys DG, et al. (2006) Molecular detection of QTLs for agronomic and quality traits in a doubled haploid population derived from two Canadian wheats (Triticum aestivum L.). Theoretical and Applied Genetics 113: 753-766.
	qTGW2D	L	2D	N	Me8Em11b	2D	N	Me8Em11a		Qing-Feng LI, Shou-Cai MA, Wang ZJ, Shi XX, Xiao-Jing BI, et al. (2012) Locating the Quantitative Trait Loci(QTL) of Wheat Yield-related Traits Based on SRAP Markers. Acta Agriculturae Boreali-Sinica 27: 72-79.
	QTKW.sicau-2D	S	2D	32970798	AX-111096297	2D	33735919	KASP-AX-94721936		This study
N: information could not be found.

## Sheet: 3D
Triat	Gene/QTL	chromosome arm	left marker information			right marker information			note*	Reference
			chromsome	physical position	ID	chromsome	physical position	ID
Kernel Width	QKW.sicau-3D	L	3D	578247057	AX-110987465	3D	573096114	AX-110543919		This study

## Sheet: 4A
Triat	Gene/QTL	chromosome arm	left marker information			right marker information			note*	Reference
			chromsome	physical position	ID	chromsome	physical position	ID
Kernel Length	QKl-4A.1	L	4A	708595439	wPt-7096	4A	708595439	wPt-669203		Cui F, Zhao C, Ding A, et al. Construction of an integrative linkage map and QTL mapping of grain yield-related traits using three related wheat RIL populations[J]. Theoretical and applied genetics, 2014, 127(3): 659-675.
	qKL-4A	L	4A	340790151	Xgwm601	4A	580662039	Xgwm610		Chen W , Sun D , Yan X , et al. QTL analysis of wheat kernel traits, and genetic effects of qKW-6A on kernel width[J]. Euphytica, 2019, 215(2).
	Q37	S	4A	N	Xbarc0170	4A	47327609	Xgwm397		Williams K , Sorrells M E . Three-Dimensional Seed Size and Shape QTL in Hexaploid Wheat ( L.) Populations[J]. Crop Science, 2014, 54(1):98.
		L	4A	616874225	IWB9237	4A	622222183	IWA8209		Mohler V, Albrecht T, Castell A, et al. Considering causal genes in the genetic dissection of kernel traits in common wheat[J]. Journal of applied genetics, 2016, 57(4): 467-476.
		L	4A	509036033	Xgwm165	4A	580662039	Xgwm610		Manickavelu A, Kawaura K, Imamura H, Mori M, Ogihara Y (2011) Molecular mapping of quantitative trait loci for domestication traits and β-glucan content in a wheat recombinant inbred line population. Euphytica 177: 179-190.
	QKl.sdau-4A	L	4A	N	Xswes24a	4A	N	Xswes24c		Sun XY, Wu K, Zhao Y, Kong FM, Han GZ, Jiang HM, Huang XJ, Li R-J, Wang HG, Li SS (2008) QTL analysis of kernel shape and weight using recombinant inbred lines in wheat. Euphytica 165:615–624
	QKL.sicau-4A	S	4A	60357852	AX-110030140	4A	41738169	AX-110132746		This study

## Sheet: 6A
Triat	Gene/QTL	chromosome arm	left marker information			right marker information			note*	Reference
			chromsome	physical position	ID	chromsome	physical position	ID
Kernel Length	QGl.cau-6A.2	L	6A	533256764	RAC875_c691_1486	6A	539649418	wsnp_Ra_c11269_18309313		Zhai H , Feng Z , Du X , et al. A novel allele of TaGW2-A1 is located in a finely mapped QTL that increases grain weight but decreases grain number in wheat (Triticum aestivum L.)[J]. Theoretical and Applied Genetics, 2017.
		L	6A	N	wPt-0139	6A	310225593	Xwmc570		Williams K , Sorrells M E . Three-Dimensional Seed Size and Shape QTL in Hexaploid Wheat ( L.) Populations[J]. Crop Science, 2014, 54(1):98.
	qKL-6A	S	6A	49408653	Xwmc201				Additive-effect QTL	Chen W , Sun D , Yan X , et al. QTL analysis of wheat kernel traits, and genetic effects of qKW-6A on kernel width[J]. Euphytica, 2019, 215(2).
	Qgl6a	L	6A	574283964	wmc553	6A	N	Me8Em3b		Qing-Feng LI, Shou-Cai MA, Wang ZJ, Shi XX, Xiao-Jing BI, et al. (2012) Locating the Quantitative Trait Loci(QTL) of Wheat Yield-related Traits Based on SRAP Markers. Acta Agriculturae Boreali-Sinica 27: 72-79.
	QKL.sicau-6A	S	6A	6266585	AX-109498898	6A	9479971	AX-111594929		This study

## Sheet: 7A
Triat	Gene/QTL	chromosome arm	left marker information			right marker information			note*	Reference
			chromsome	physical position	ID	chromsome	physical position	ID
Kernel Length	QKl-7A.1	S	7A	N	wPt-4172	7A	165071458	Xbarc49.1		Cui F, Zhao C, Ding A, et al. Construction of an integrative linkage map and QTL mapping of grain yield-related traits using three related wheat RIL populations[J]. Theoretical and applied genetics, 2014, 127(3): 659-675.
	QGl.cau-7A.1	S	7A	6798631	Xwmc17	7A	240748197	BobWhite_c911_127		Zhai H, Feng Z, Du X, Song Y, Liu X, et al. (2018) A novel allele of TaGW2-A1 is located in a finely mapped QTL that increases grain weight but decreases grain number in wheat (Triticum aestivum L.). Theoretical and Applied Genetics 131: 539-553.
		S	7A	83245709	wPt-0321	7A	611837847	Xbarc121		Williams K , Sorrells M E . Three-Dimensional Seed Size and Shape QTL in Hexaploid Wheat ( L.) Populations[J]. Crop Science, 2014, 54(1):98.
		L	7A	628179678	barc49	7A	349164295	barc259		Manli YU, Zhao L, Guo H, Jiayu GU, Junhui LI, et al. (2014) QTL Mapping for Kernel Traits in Wheat. Journal of Triticeae Crops.
	QGl.ccsu-7A.1	S	7A	N	Xwmc388	7A	3209704	Xgwm350		Tyagi S, Mir RR, Balyan HS, Gupta PK (2015) Interval mapping and meta-QTL analysis of grain traits in common wheat ( Triticum aestivum L.). Euphytica 201: 367-380
		S	7A	33652541	Xwmc168	7A	61833829	Xwmc283		Manickavelu A, Kawaura K, Imamura H, Mori M, Ogihara Y (2011) Molecular mapping of quantitative trait loci for domestication traits and β-glucan content in a wheat recombinant inbred line population. Euphytica 177: 179-190.
	QKL.sicau-7A	S	7A	82376644	AX-109868790	7A	83907639	AX-108824792	the flanking marker AX-11046019 was physically mapped on 3A and its closest one AX-94547362 was on 7D, and thus AX-108824792 flanking AX-94547362 is used to predicate the position	This study
