# Supplementary material for: Identification of quantitative trait loci for kernel traits in a wheat cultivar Chuannong16
Source: BMC Genet. 2019 Oct 16;20:77. doi: 10.1186/s12863-019-0782-4 (PMC6796374; doi:10.1186/s12863-019-0782-4)
Supplement: Supplementary file 7 — Additional file 7: Table S6. Predicted genes in the interval of the QTL identified in this study. [file 12863_2019_782_MOESM7_ESM.xlsx]

## Sheet: Table S6
Table S6 Predicted genes in the interval of the QTL identified in this study

## Sheet: KL,KW,TKW-2D
the co-located interval for QKL.sicau-2D, QKW.sicau-2D and QTKW.sicau-2D
Gene ID in CS	Annotation	Reference
TraesCS2D01G077200	methyl-coenzyme M reductase II subunit gamma	Ermler, U., Grabarse, W., Shima, S., Goubeaud, M., & Thauer, R. K. (1997). Crystal structure of methyl-coenzyme m reductase: the key enzyme of biological methane formation. Science, 278(5342), 1457-1462.
TraesCS2D01G077300	LPS-induced tumor necrosis factor alpha factor	Haziot, A., Rong, G. W., Bazil, V., Silver, J., & Goyert, S. M. (1994). Recombinant soluble cd14 inhibits lps-induced tumor necrosis factor-alpha production by cells in whole blood. Journal of Immunology, 152(12), 5868-5876.
TraesCS2D01G077400	Actin cross-linking protein, putative (DUF569)	Jia H, Li J, Zhu J, et al. Arabidopsis CROLIN1, a novel plant actin binding protein, functions in cross-linking and stabilizing actin filaments[J]. Journal of Biological Chemistry, 2013: jbc. M113. 483594.
TraesCS2D01G077500
TraesCS2D01G077600
TraesCS2D01G077800
TraesCS2D01G078100
TraesCS2D01G078300
TraesCS2D01G077700	DNAJ heat shock N-terminal domain-containing protein-like	Nose, M., & Watanabe, A. (2014). Clock genes and diurnal transcriptome dynamics in summer and winter in the gymnosperm japanese cedar ( cryptomeria japonica (l.f.) d.don). Bmc Plant Biology, 14(1), 308.
TraesCS2D01G077900	DnaJ domain containing protein, expressed	Maruyama D, Yamamoto M, Endo T, et al. Different sets of ER-resident J-proteins regulate distinct polar nuclear-membrane fusion events in Arabidopsis thaliana[J]. Plant and Cell Physiology, 2014, 55(11): 1937-1944.
TraesCS2D01G078000
TraesCS2D01G078200	F-box family protein	Dharmasiri N, Dharmasiri S, Weijers D, et al. Plant development is regulated by a family of auxin receptor F box proteins[J]. Developmental cell, 2005, 9(1): 109-119.
TraesCS2D01G078400	Gag-pol polyprotein	Karacostas, V., Wolffe, E. J., Nagashima, K., Gonda, M. A., & Moss, B. (1993). Overexpression of the HIV-1 gag-pol polyprotein results in intracellular activation of HIV-1 protease and inhibition of assembly and budding of virus-like particles. Virology, 193(2), 661-671.
TraesCS2D01G078500	Kinase interacting (KIP1-like) family protein	Gaudet P, Livstone M S, Lewis S E, et al. Phylogenetic-based propagation of functional annotations within the Gene Ontology consortium[J]. Briefings in bioinformatics, 2011, 12(5): 449-462.
TraesCS2D01G078600	Expansin protein	Sampedro J, Cosgrove D J. The expansin superfamily[J]. Genome Biology, 2005, 6(12): 242-242.

## Sheet: KL，TKW-1A
the co-located interval for QKL.sicau-1A and QTKW.sicau-1A
Gene ID in CS	Annotation	Reference
TraesCS1A01G426700	RNA polymerase sigma factor	Travers A A, Burgess R R. Cyclic re-use of the RNA polymerase sigma factor[J]. Nature, 1969, 222(5193): 537.
TraesCS1A01G431600
TraesCS1A01G426800	Polypyrimidine tract-binding-like protein	Trujillo D I, Silverstein K A T, Young N D. Nodule‐specific PLAT domain proteins are expanded in the Medicago lineage and required for nodulation[J]. New Phytologist, 2019, 222(3): 1538-1550.
TraesCS1A01G426900	Pentatricopeptide repeat-containing protein	Bentolila S, Alfonso A A, Hanson M R. A pentatricopeptide repeat-containing gene restores fertility to cytoplasmic male-sterile plants[J]. Proceedings of the National Academy of Sciences, 2002, 99(16): 10887-10892.
TraesCS1A01G433400
TraesCS1A01G427000	Protein phosphatase 2C family protein	Xue T, Wang D, Zhang S, et al. Genome-wide and expression analysis of protein phosphatase 2C in rice and Arabidopsis[J]. BMC genomics, 2008, 9(1): 550.
TraesCS1A01G427100	CTP synthase	Long C W, Pardee A B. Cytidine triphosphate synthetase of Escherichia coli B I. Purification and kinetics[J]. Journal of Biological Chemistry, 1967, 242(20): 4715-4721.
TraesCS1A01G427200	Protein N-methyltransferase	Li E, Bestor T H, Jaenisch R. Targeted mutation of the DNA methyltransferase gene results in embryonic lethality[J]. Cell, 1992, 69(6): 915-926.
TraesCS1A01G432300
TraesCS1A01G427300	Leucine-rich repeat receptor-like protein kinase family protein	Gou X, He K, Yang H, et al. Genome-wide cloning and sequence analysis of leucine-rich repeat receptor-like protein kinase genes in Arabidopsis thaliana[J]. Bmc Genomics, 2010, 11(1):1-15.
TraesCS1A01G431100
TraesCS1A01G431200
TraesCS1A01G427400	TPR repeat-containing thioredoxin TTL1	Poncet V, Couderc M, Tranchant‐Dubreuil C, et al. Microsatellite markers for Amborella (Amborellaceae), a monotypic genus endemic to New Caledonia[J]. American journal of botany, 2012, 99(10): e411-e414.
TraesCS1A01G427500	intracellular protein transporter	Rothman J E. Mechanisms of intracellular protein transport[J]. Nature, 1994, 372(6501): 55.
TraesCS1A01G427600	muscle M-line assembly protein	Benian G M, Tinley T L, Tang X, et al. The Caenorhabditis elegans gene unc-89, required fpr muscle M-line assembly, encodes a giant modular protein composed of Ig and signal transduction domains[J]. The Journal of Cell Biology, 1996, 132(5): 835-848.
TraesCS1A01G427700	Tesmin/TSO1-like CXC domain-containing protein	Yang Z, Gu S, Wang X, et al. Molecular evolution of the CPP-like gene family in plants: insights from comparative genomics of Arabidopsis and rice[J]. Journal of molecular evolution, 2008, 67(3): 266-277.
TraesCS1A01G427800
TraesCS1A01G427900	DNA topoisomerase	Liu L F. DNA topoisomerase poisons as antitumor drugs[J]. Annual review of biochemistry, 1989, 58(1): 351-375.
TraesCS1A01G428000	Tesmin/TSO1-like CXC domain protein	Andersen S U, Algreen-Petersen R G, Hoedl M, et al. The conserved cysteine-rich domain of a tesmin/TSO1-like protein binds zinc in vitro and TSO1 is required for both male and female fertility in Arabidopsis thaliana[J]. Journal of experimental botany, 2007, 58(13): 3657-3670.
TraesCS1A01G428100	Acyl-protein thioesterase	Duncan J A, Gilman A G. A cytoplasmic acyl-protein thioesterase that removes palmitate from G protein α subunits and p21RAS[J]. Journal of Biological Chemistry, 1998, 273(25): 15830-15837.
TraesCS1A01G428200	F-box protein	Dharmasiri N, Dharmasiri S, Estelle M. The F-box protein TIR1 is an auxin receptor[J]. Nature, 2005, 435(7041): 441.
TraesCS1A01G428600
TraesCS1A01G433200
TraesCS1A01G428300	F-box and associated interaction domains-containing protein	Song J B, Wang Y X, Li H B, et al. The F-box family genes as key elements in response to salt, heavy mental, and drought stresses in Medicago truncatula[J]. Functional & integrative genomics, 2015, 15(4): 495-507.
TraesCS1A01G428400	Tryptophan synthase alpha chain	Murgola E J, Yanofsky C. Structural interactions between amino acid residues at positions 22 and 211 in the tryptophan synthetase alpha chain of Escherichia coli[J]. Journal of bacteriology, 1974, 117(2): 444-448.
TraesCS1A01G428500	Protein SPA1-RELATED 3	Lu X D, Zhou C M, Xu P B, et al. Red-light-dependent interaction of phyB with SPA1 promotes COP1–SPA1 dissociation and photomorphogenic development in Arabidopsis[J]. Molecular plant, 2015, 8(3): 467-478.
TraesCS1A01G428700	Structural maintenance of chromosomes protein	Strunnikov A V, Jessberger R. Structural maintenance of chromosomes (SMC) proteins: conserved molecular properties for multiple biological functions[J]. European journal of biochemistry, 1999, 263(1): 6-13.
TraesCS1A01G428800	Delta-aminolevulinic acid dehydratase	Sassa S. Delta-aminolevulinic acid dehydratase assay[J]. Enzyme, 1982, 28: 133-145.
TraesCS1A01G428900	F-box domain containing protein	Tsukada Y, Fang J, Erdjument-Bromage H, et al. Histone demethylation by a family of JmjC domain-containing proteins[J]. Nature, 2006, 439(7078): 811.
TraesCS1A01G429000	transmembrane protein	Bonifacino J . Signals for sorting of transmembrane proteins to endosomes and lysosomes[J]. Annu. Rev. Biochem. 2003, 72(1):395-447.
TraesCS1A01G429500
TraesCS1A01G429600
TraesCS1A01G429100	Paired amphipathic helix protein Sin3	Wang H, Clark I, Nicholson P R, et al. The Saccharomyces cerevisiae SIN3 gene, a negative regulator of HO, contains four paired amphipathic helix motifs[J]. Molecular and Cellular Biology, 1990, 10(11): 5927-5936.
TraesCS1A01G429200
TraesCS1A01G429300	ATP-dependent zinc metalloprotease FtsH	Tomoyasu T, Gamer J, Bukau B, et al. Escherichia coli FtsH is a membrane‐bound, ATP‐dependent protease which degrades the heat‐shock transcription factor sigma 32[J]. The EMBO Journal, 1995, 14(11): 2551-2560.
TraesCS1A01G429800
TraesCS1A01G430000
TraesCS1A01G430100
TraesCS1A01G430200
TraesCS1A01G429400	dihydroflavonol 4-reductase/flavanone protein	Charrier B, Coronado C, Kondorosi A, et al. Molecular characterization and expression of alfalfa (Medicago sativa L.) flavanone-3-hydroxylase and dihydroflavonol-4-reductase encoding genes[J]. Plant molecular biology, 1995, 29(4): 773-786.
TraesCS1A01G429700	Glucosidase 2 subunit beta	Stigliano I D, Caramelo J J, Labriola C A, et al. Glucosidase II β subunit modulates N-glycan trimming in fission yeasts and mammals[J]. Molecular biology of the cell, 2009, 20(17): 3974-3984.
TraesCS1A01G429900	P-glycoprotein 11	Yates C R, Chang C, Kearbey J D, et al. Structural determinants of P-glycoprotein-mediated transport of glucocorticoids[J]. Pharmaceutical research, 2003, 20(11): 1794-1803.
TraesCS1A01G430300	Fructose-bisphosphate aldolase	MISSET O, OPPERDOES F R. Simultaneous purification of hexokinase, class‐I fructose‐bisphosphate aldolase, triosephosphate isomerase and phosphoglycerate kinase from Trypanosoma brucei[J]. European Journal of Biochemistry, 1984, 144(3): 475-483.
TraesCS1A01G430400	Lysine-specific demethylase	Schulte J H, Lim S, Schramm A, et al. Lysine-specific demethylase 1 is strongly expressed in poorly differentiated neuroblastoma: implications for therapy[J]. Cancer research, 2009, 69(5): 2065-2071.
TraesCS1A01G430500	E3 ubiquitin-protein ligase MARCH6	Nakamura N, Harada K, Kato M, et al. Ubiquitin-specific protease 19 regulates the stability of the E3 ubiquitin ligase MARCH6[J]. Experimental cell research, 2014, 328(1): 207-216.
TraesCS1A01G430800
TraesCS1A01G430600	carboxyl-terminal peptidase (DUF239)	Dalbey R E, Wickner W. The role of the polar, carboxyl-terminal domain of Escherichia coli leader peptidase in its translocation across the plasma membrane[J]. Journal of Biological Chemistry, 1986, 261(29): 13844-13849.
TraesCS1A01G430700	Trimethylguanosine synthase	Chang J, Schwer B, Shuman S. Mutational analyses of trimethylguanosine synthase (Tgs1) and Mud2: proteins implicated in pre-mRNA splicing[J]. RNA, 2010, 16(5): 1018-1031.
TraesCS1A01G430900	RNase P Rpr2/Rpp21 subunit domain protein	Walker S C, Engelke D R. Ribonuclease P: the evolution of an ancient RNA enzyme[J]. Critical reviews in biochemistry and molecular biology, 2006, 41(2): 77-102.
TraesCS1A01G431000	F-box family protein	Dharmasiri N, Dharmasiri S, Weijers D, et al. Plant development is regulated by a family of auxin receptor F box proteins[J]. Developmental cell, 2005, 9(1): 109-119.
TraesCS1A01G431800
TraesCS1A01G431900
TraesCS1A01G431300	Type II proteinase inhibitor family protein	Bode W, Huber R. Natural protein proteinase inhibitors and their interaction with proteinases[J]. European Journal of Biochemistry, 1992, 204(2): 433-451.
TraesCS1A01G431400	Pathogen-related protein	Kim S T, Yu S, Kang Y H, et al. The rice pathogen-related protein 10 (JIOsPR10) is induced by abiotic and biotic stresses and exhibits ribonuclease activity[J]. Plant Cell Reports, 2008, 27(3): 593.
TraesCS1A01G431500	Phosphoglucan phosphatase LSF1	Comparot-Moss S, Kötting O, Stettler M, et al. A putative phosphatase, LSF1, is required for normal starch turnover in Arabidopsis leaves[J]. Plant physiology, 2010, 152(2): 685-697.
TraesCS1A01G431700	Plant basic secretory family protein	Herrmann A, König S, Lechtenberg M, et al. Proteoglycans from Boswellia serrata Roxb. and B. carteri Birdw. and identification of a proteolytic plant basic secretory protein[J]. Glycobiology, 2012, 22(11): 1424-1439.
TraesCS1A01G432000	Lectin receptor kinase	Chen X, Shang J, Chen D, et al. AB‐lectin receptor kinase gene conferring rice blast resistance[J]. The Plant Journal, 2006, 46(5): 794-804.
TraesCS1A01G432400
TraesCS1A01G432100	Ubiquitin carboxyl-terminal hydrolase	Rose I A. Ubiquitin Carboxyl-Terminal Hydrolases[M]// Ubiquitin. 1988.
TraesCS1A01G432200
TraesCS1A01G432500
TraesCS1A01G432600
TraesCS1A01G432700	CST complex subunit TEN1-like protein	Surovtseva Y V, Churikov D, Boltz K A, et al. Conserved telomere maintenance component 1 interacts with STN1 and maintains chromosome ends in higher eukaryotes[J]. Molecular cell, 2009, 36(2): 207-218.
TraesCS1A01G432800	Metacaspase	Belenghi B, Romero-Puertas M C, Vercammen D, et al. Metacaspase activity of Arabidopsis thaliana is regulated by S-nitrosylation of a critical cysteine residue[J]. Journal of Biological Chemistry, 2007, 282(2): 1352-1358.
TraesCS1A01G432900	Na-translocating NADH-quinone reductase subunit A	Hayashi M, Hirai K, Unemoto T. Sequencing and the alignment of structural genes in the nqr operon encoding the Na+‐translocating NADH‐quinone reductase from Vibrio alginolyticus[J]. FEBS letters, 1995, 363(1-2): 75-77.
TraesCS1A01G433000	RNA binding protein	Hafner M, Landthaler M, Burger L, et al. Transcriptome-wide identification of RNA-binding protein and microRNA target sites by PAR-CLIP[J]. Cell, 2010, 141(1): 129-141.
TraesCS1A01G433100	Protein kinase family protein	Hanks S K, Quinn A M, Hunter T. The protein kinase family: conserved features and deduced phylogeny of the catalytic domains[J]. Science, 1988, 241(4861): 42-52.
TraesCS1A01G433500
TraesCS1A01G433300	Cytoplasmic membrane protein	Driessen A J M, Nouwen N. Protein translocation across the bacterial cytoplasmic membrane[J]. Annu. Rev. Biochem., 2008, 77: 643-667.
TraesCS1A01G433600	Disease resistance protein (NBS-LRR class) family	Gassmann W, Hinsch M E, Staskawicz B J. The Arabidopsis RPS4 bacterial‐resistance gene is a member of the TIR‐NBS‐LRR family of disease‐resistance genes[J]. The Plant Journal, 1999, 20(3): 265-277.
TraesCS1A01G433700	50S ribosomal protein L14	Tischendorf G W, Zeichhardt H, Stöffler G. Determination of the location of proteins L14, L17, L18, L19, L22 and L23 on the surface of the 50S ribosomal subunit of Escherichia coli by immune electron microscopy[J]. Molecular and General Genetics MGG, 1974, 134(3): 187-208.
TraesCS1A01G433800
TraesCS1A01G433900	FAD-binding Berberine family protein	Radauer C, Bublin M, Wagner S, et al. Allergens are distributed into few protein families and possess a restricted number of biochemical functions[J]. Journal of Allergy and Clinical Immunology, 2008, 121(4): 847-852. e7.

## Sheet: KL, TKW-2B
the co-located interval for QKL.sicau-2B and QTKW.sicau-2B
Gene ID in CS	Annotation	Reference
TraesCS2B01G106500	Short-chain dehydrogenase/reductase family protein	Kavanagh K L, Jörnvall H, Persson B, et al. Medium- and short-chain dehydrogenase/reductase gene and protein families[J]. Cellular and Molecular Life Sciences (CMLS), 2008, 65(24):3879-3894.
TraesCS2B01G106600
TraesCS2B01G106700	Wound-induced protein 1	Bravo J M, Campo S, Murillo I, et al. Fungus-and wound-induced accumulation of mRNA containing a class II chitinase of the pathogenesis-related protein 4 (PR-4) family of maize[J]. Plant molecular biology, 2003, 52(4): 745-759.
TraesCS2B01G106800
TraesCS2B01G107100
TraesCS2B01G106900	Receptor-like kinase	Gómez-Gómez L, Boller T. FLS2: an LRR receptor–like kinase involved in the perception of the bacterial elicitor flagellin in Arabidopsis[J]. Molecular cell, 2000, 5(6): 1003-1011.
TraesCS2B01G107000	F-box family protein	Dharmasiri N, Dharmasiri S, Weijers D, et al. Plant development is regulated by a family of auxin receptor F box proteins[J]. Developmental cell, 2005, 9(1): 109-119.
TraesCS2B01G107900
TraesCS2B01G108100
TraesCS2B01G108400
TraesCS2B01G107200	D-alanine--D-alanine ligase	Bugg T D H, Dutka-Malen S, Arthur M, et al. Identification of vancomycin resistance protein VanA as a D-alanine: D-alanine ligase of altered substrate specificity[J]. Biochemistry, 1991, 30(8): 2017-2021.
TraesCS2B01G107300	Ta11-like non-LTR retrotransposon	Shirasu K, Schulman A H, Lahaye T, et al. A contiguous 66-kb barley DNA sequence provides evidence for reversible genome expansion[J]. Genome Research, 2000, 10(7): 908-915.
TraesCS2B01G107400	ACT domain-containing protein	Liberles J S, Thórólfsson M, Martinez A. Allosteric mechanisms in ACT domain containing enzymes involved in amino acid metabolism[J]. Amino acids, 2005, 28(1): 1-12.
TraesCS2B01G107500	Pectinesterase	Ma R, Reese J C, Black IV W C, et al. Detection of pectinesterase and polygalacturonase from salivary secretions of living greenbugs, Schizaphis graminum (Homoptera: Aphididae)[J]. Journal of Insect Physiology, 1990, 36(7): 507-512.
TraesCS2B01G107600	UBiQuitin family member	Bates E E M, Ravel O, Dieu M C, et al. Identification and analysis of a novel member of the ubiquitin family expressed in dendritic cells and mature B cells[J]. European journal of immunology, 1997, 27(10): 2471-2477.
TraesCS2B01G107700	Protein COBRA	Cochrane C G, Müller-Eberhard H J, Aikin B S. Depletion of plasma complement in vivo by a protein of cobra venom: its effect on various immunologic reactions[J]. The Journal of Immunology, 1970, 105(1): 55-69.
TraesCS2B01G107800	Ubiquitin	Hershko, A., & Ciechanover, A. (1998). The ubiquitin system.
TraesCS2B01G108000	Membrane-bound lytic murein transglycosylase C	Blackburn N T, Clarke A J. Identification of four families of peptidoglycan lytic transglycosylases[J]. Journal of molecular evolution, 2001, 52(1): 78-84.
TraesCS2B01G108200	Protein phosphatase 2C-like	Bork P, Brown N P, Hegyi H, et al. The protein phosphatase 2C (PP2C) superfamily: detection of bacterial homologues[J]. Protein Science, 1996, 5(7): 1421-1425.
TraesCS2B01G108300	Pleckstrin homology domain-containing family A member 8	Shaw G. The pleckstrin homology domain: an intriguing multifunctional protein module[J]. Bioessays, 1996, 18(1): 35-46.
TraesCS2B01G108500	F-box domain containing protein-like	Li M, Tang D, Wang K, et al. Mutations in the F‐box gene LARGER PANICLE improve the panicle architecture and enhance the grain yield in rice[J]. Plant biotechnology journal, 2011, 9(9): 1002-1013.
TraesCS2B01G108600
TraesCS2B01G108700	basic helix-loop-helix (bHLH) DNA-binding superfamily protein	Shaknovich R, Shue G, Kohtz D S. Conformational activation of a basic helix-loop-helix protein (MyoD1) by the C-terminal region of murine HSP90 (HSP84)[J]. Molecular and cellular biology, 1992, 12(11): 5059-5068.
TraesCS2B01G108800	PHD and RING finger domain-containing protein 1	Friedman J R, Fredericks W J, Jensen D E, et al. KAP-1, a novel corepressor for the highly conserved KRAB repression domain[J]. Genes & development, 1996, 10(16): 2067-2078.
TraesCS2B01G108900	DUF3511 domain protein	Wang K, Yang Z, Qing D, et al. Quantitative and functional post-translational modification proteomics reveals that TREPH1 plays a role in plant thigmomorphogenesis[J]. arXiv preprint arXiv:1808.04113, 2018.
TraesCS2B01G109000	Ribosomal protein L19	Chan Y L, Lin A, McNally J, et al. The primary structure of rat ribosomal protein L19. A determination from the sequence of nucleotides in a cDNA and from the sequence of amino acids in the protein[J]. Journal of Biological Chemistry, 1987, 262(3): 1111-1115.
TraesCS2B01G109100	vesicle transport V-snare 13	Schiavo G, Stenbeck G, Rothman J E, et al. Binding of the synaptic vesicle v-SNARE, synaptotagmin, to the plasma membrane t-SNARE, SNAP-25, can explain docked vesicles at neurotoxin-treated synapses[J]. Proceedings of the National Academy of Sciences, 1997, 94(3): 997-1001.
TraesCS2B01G109200	Retrotransposon protein	Kumar, Anuj. Using yeast transposon-insertion libraries for phenotypic screening and protein localization[J]. Cold Spring Harb Protoc, 2016, 2016(6):pdb.prot085217.
TraesCS2B01G109300	Alpha-soluble NSF attachment protein	Ryu J K, Min D, Rah S H, et al. Spring-loaded unraveling of a single SNARE complex by NSF in one round of ATP turnover[J]. Science, 2015, 347(6229): 1485-1489.
TraesCS2B01G109400	Hexosyltransferase	Baga M, Glaze S, Mallard C S, et al. starch-branching enzyme gene in wheat produces alternatively spliced transcripts[J]. Plant molecular biology, 1999.
TraesCS2B01G109700
TraesCS2B01G109800
TraesCS2B01G109500	DHHC-type zinc finger family protein	Kilpatrick C L, Murakami S, Feng M, et al. Dissociation of Golgi-associated DHHC-type zinc finger protein (GODZ)-and Sertoli cell gene with a zinc finger domain-β (SERZ-β)-mediated palmitoylation by loss of function analyses in knock-out mice[J]. Journal of Biological Chemistry, 2016, 291(53): 27371-27386.
TraesCS2B01G109600	GRF zinc finger family protein	Lee K H, Lee W Y, Kim J H, et al. Characterization of GFR α‐1‐Positive and GFR α‐1‐Negative Spermatogonia in Neonatal Pig Testis[J]. Reproduction in Domestic Animals, 2013, 48(6): 954-960.
TraesCS2B01G110200
TraesCS2B01G109900	BRCT domain-containing protein	Mäkiniemi M, Hillukkala T, Tuusa J, et al. BRCT domain-containing protein TopBP1 functions in DNA replication and damage response[J]. Journal of Biological Chemistry, 2001, 276(32): 30399-30406.
TraesCS2B01G110000	Defensin	Kovalchuk N, Li M, Wittek F, et al. Defensin promoters as potential tools for engineering disease resistance in cereal grains[J]. Plant biotechnology journal, 2010, 8(1): 47-64.
TraesCS2B01G110100
TraesCS2B01G110300	DnaJ	Cyr D M, Langer T, Douglas M G. DnaJ-like proteins: molecular chaperones and specific regulators of Hsp70[J]. Trends in biochemical sciences, 1994, 19(4): 176-181.
TraesCS2B01G110400	cAMP-regulated phosphoprotein-like protein	Bassilana F, Mace N, Li Q, et al. Unraveling substantia nigra sequential gene expression in a progressive MPTP-lesioned macaque model of Parkinson's disease[J]. Neurobiology of disease, 2005, 20(1): 93-103.
TraesCS2B01G110500	Protein kinase	Manning G, Whyte D B, Martinez R, et al. The protein kinase complement of the human genome[J]. Science, 2002, 298(5600): 1912-1934.
TraesCS2B01G110600	Multidrug resistance protein ABC transporter family protein	Haimeur A, Conseil G, Deeley R G, et al. The MRP-related and BCRP/ABCG2 multidrug resistance proteins: biology, substrate specificity and regulation[J]. Current drug metabolism, 2004, 5(1): 21-53.
TraesCS2B01G110700	O-methyltransferase-like protein	Chedin F , Lieber M R , Hsieh C L . The DNA methyltransferase-like protein DNMT3L stimulates de novo methylation by Dnmt3a[J]. Proceedings of the National Academy of Sciences, 2002, 99(26):16916-16921.

## Sheet: KW-3D
the interval for QKW.sicau-3D
Gene ID in CS	Annotation	Reference
TraesCS3D01G470900	Phosphate transporter	Bellocchio E E, Reimer R J, Fremeau R T, et al. Uptake of glutamate into synaptic vesicles by an inorganic phosphate transporter[J]. Science, 2000, 289(5481): 957-960.
TraesCS3D01G471000	Protein kinase	Manning G, Whyte D B, Martinez R, et al. The protein kinase complement of the human genome[J]. Science, 2002, 298(5600): 1912-1934.
TraesCS3D01G471100	tRNA (Guanine(26)-N(2))-dimethyltransferase	Li E, Bestor T H, Jaenisch R. Targeted mutation of the DNA methyltransferase gene results in embryonic lethality[J]. Cell, 1992, 69(6): 915-926.
TraesCS3D01G471200	Pimeloyl-[acyl-carrier protein] methyl ester esterase	Shi J, Cao X, Chen Y, et al. An atypical α/β-Hydrolase fold revealed in the crystal structure of Pimeloyl-Acyl carrier protein methyl esterase BioG from Haemophilus influenzae[J]. Biochemistry, 2016, 55(48): 6705-6717.
TraesCS3D01G471300	F-box family protein	Dharmasiri N, Dharmasiri S, Weijers D, et al. Plant development is regulated by a family of auxin receptor F box proteins[J]. Developmental cell, 2005, 9(1): 109-119.
TraesCS3D01G477400
TraesCS3D01G471400	PAX-interacting protein 1	Kumar A, Lualdi M, Loncarek J, et al. Loss of function of mouse Pax‐Interacting Protein 1‐associated glutamate rich protein 1a (Pagr1a) leads to reduced Bmp2 expression and defects in chorion and amnion development[J]. Developmental Dynamics, 2014, 243(7): 937-947.
TraesCS3D01G471500	2-oxoglutarate (2OG) and Fe(II)-dependent oxygenase superfamily protein	Aravind L, Koonin E V. The DNA-repair protein AlkB, EGL-9, and leprecan define new families of 2-oxoglutarate-and iron-dependent dioxygenases[J]. Genome biology, 2001, 2(3): research0007. 1.
TraesCS3D01G471900
TraesCS3D01G471600	Serpin family protein	Filleur S, Nelius T, De Riese W, et al. Characterization of PEDF: a multi‐functional serpin family protein[J]. Journal of cellular biochemistry, 2009, 106(5): 769-775.
TraesCS3D01G471700	general regulatory factor 1	Nishizawa M, Suzuki Y, Nogi Y, et al. Yeast Gal11 protein mediates the transcriptional activation signal of two different transacting factors, Gal4 and general regulatory factor I/repressor/activator site binding protein 1/translation upstream factor[J]. Proceedings of the National Academy of Sciences, 1990, 87(14): 5373-5377.
TraesCS3D01G471800	transmembrane protein	Bonifacino J . Signals for sorting of transmembrane proteins to endosomes and lysosomes[J]. Annu. Rev. Biochem. 2003, 72(1):395-447.
TraesCS3D01G472000	Receptor-like protein kinase	Ye Y , Ding Y , Jiang Q , et al. The role of receptor-like protein kinases (RLKs) in abiotic stress response in plants[J]. Plant Cell Reports, 2017, 36(2):235-242.
TraesCS3D01G472100	Eukaryotic peptide chain release factor subunit 1-1	Frolova L, Le Goff X, Zhouravleva G, et al. Eukaryotic polypeptide chain release factor eRF3 is an eRF1-and ribosome-dependent guanosine triphosphatase[J]. Rna, 1996, 2(4): 334.
TraesCS3D01G472200
TraesCS3D01G472300	Leucine-rich repeat receptor-like kinase	Gao, Minghui, et al. "Regulation of Cell Death and Innate Immunity by Two Receptor-like Kinases in Arabidopsis." Cell Host & Microbe 6.1(2009):34. ；Albert, Isabell, et al. "An RLP23–SOBIR1–BAK1 complex mediates NLP-triggered immunity." Nat Plants 1.10(2015):15140.
TraesCS3D01G473200
TraesCS3D01G472400	Pentatricopeptide repeat-containing protein	Bentolila S, Alfonso A A, Hanson M R. A pentatricopeptide repeat-containing gene restores fertility to cytoplasmic male-sterile plants[J]. Proceedings of the National Academy of Sciences, 2002, 99(16): 10887-10892.
TraesCS3D01G472500	F-box protein	Dharmasiri N, Dharmasiri S, Estelle M. The F-box protein TIR1 is an auxin receptor[J]. Nature, 2005, 435(7041): 441.
TraesCS3D01G474400
TraesCS3D01G473000	S-formylglutathione hydrolase	Uotila L, Koivusalo M. Purification and properties of S-formylglutathione hydrolase from human liver[J]. Journal of Biological Chemistry, 1974, 249(23): 7664-7672.
TraesCS3D01G473100	Cortactin-binding protein 2	Cheung J, Petek E, Nakabayashi K, et al. Identification of the human cortactin-binding protein-2 gene from the autism candidate region at 7q31[J]. Genomics, 2001, 78(1-2): 7-11.
TraesCS3D01G473300	CASP-like protein	Cruz J A, Blanchet M F, Boniecki M, et al. RNA-Puzzles: a CASP-like evaluation of RNA three-dimensional structure prediction[J]. Rna, 2012, 18(4): 610-625.
TraesCS3D01G473400	Potassium transporter	Santa-María G E, Rubio F, Dubcovsky J, et al. The HAK1 gene of barley is a member of a large gene family and encodes a high-affinity potassium transporter[J]. The Plant Cell, 1997, 9(12): 2281-2289.
TraesCS3D01G473500	Tyrosyl-DNA phosphodiesterase 2	Ledesma F C, El Khamisy S F, Zuma M C, et al. A human 5′-tyrosyl DNA phosphodiesterase that repairs topoisomerase-mediated DNA damage[J]. Nature, 2009, 461(7264): 674.
TraesCS3D01G473600	Glycerol-3-phosphate dehydrogenase [NAD(+)]	Blomberg A, Adler L. Roles of glycerol and glycerol-3-phosphate dehydrogenase (NAD+) in acquired osmotolerance of Saccharomyces cerevisiae[J]. Journal of Bacteriology, 1989, 171(2): 1087-1092.
TraesCS3D01G472700	Disease resistance protein (TIR-NBS-LRR class) family	Gassmann W, Hinsch M E, Staskawicz B J. The Arabidopsis RPS4 bacterial‐resistance gene is a member of the TIR‐NBS‐LRR family of disease‐resistance genes[J]. The Plant Journal, 1999, 20(3): 265-277.
TraesCS3D01G472900
TraesCS3D01G473800
TraesCS3D01G472600	Disease resistance protein RPM1	Hubert D A, Tornero P, Belkhadir Y, et al. Cytosolic HSP90 associates with and modulates the Arabidopsis RPM1 disease resistance protein[J]. The EMBO journal, 2003, 22(21): 5679-5689.
TraesCS3D01G473900
TraesCS3D01G472800	Disease resistance protein RPP13	Rose L E, Bittner-Eddy P D, Langley C H, et al. The maintenance of extreme amino acid diversity at the disease resistance gene, RPP13, in Arabidopsis thaliana[J]. Genetics, 2004, 166(3): 1517-1527.
TraesCS3D01G474100
TraesCS3D01G473700	NBS-LRR-like resistance protein	Sahoo D K, Abeysekara N S, Cianzio S R, et al. A novel Phytophthora sojae resistance Rps12 gene mapped to a genomic region that contains several Rps genes[J]. PloS one, 2017, 12(1): e0169950.
TraesCS3D01G474000
TraesCS3D01G474200
TraesCS3D01G474300
TraesCS3D01G474500	Arabinogalactan peptide 3	Fincher G B, Sawyer W H, Stone B A. Chemical and physical properties of an arabinogalactan-peptide from wheat endosperm[J]. Biochemical Journal, 1974, 139(3): 535-545.
TraesCS3D01G474600	Cytochrome P450	Guengerich F P. Cytochrome p450 and chemical toxicology[J]. Chemical research in toxicology, 2007, 21(1): 70-83.
TraesCS3D01G474900
TraesCS3D01G474700	Pleiotropic drug resistance ABC transporter	Crouzet J, Trombik T, Fraysse Å S, et al. Organization and function of the plant pleiotropic drug resistance ABC transporter family[J]. FEBS letters, 2006, 580(4): 1123-1130.
TraesCS3D01G475000	Beta-1	Kulkarni A B, Huh C G, Becker D, et al. Transforming growth factor beta 1 null mutation in mice causes excessive inflammatory response and early death[J]. Proceedings of the National Academy of Sciences, 1993, 90(2): 770-774.
TraesCS3D01G475100
TraesCS3D01G475200
TraesCS3D01G477300
TraesCS3D01G478000
TraesCS3D01G478200
TraesCS3D01G478800
TraesCS3D01G475400	BTB/POZ domain-containing protein	Tao Y M, Huang J L, Zeng S, et al. BTB/POZ domain‐containing protein 7: Epithelial‐mesenchymal transition promoter and prognostic biomarker of hepatocellular carcinoma[J]. Hepatology, 2013, 57(6): 2326-2337.
TraesCS3D01G475500	high chlorophyll fluorescence 153	Georgieva K, Yordanov I. Temperature dependence of chlorophyll fluorescence parameters of pea seedlings[J]. Journal of Plant Physiology, 1993, 142(2): 151-155.
TraesCS3D01G475600	Phosphotransferase	Postma P W, Lengeler J W, Jacobson G R. Phosphoenolpyruvate: carbohydrate phosphotransferase systems of bacteria[J]. Microbiology and Molecular Biology Reviews, 1993, 57(3): 543-594.
TraesCS3D01G475700	Transposon protein	Kumar, Anuj. Using yeast transposon-insertion libraries for phenotypic screening and protein localization[J]. Cold Spring Harb Protoc, 2016, 2016(6):pdb.prot085217.
TraesCS3D01G475800	Cytokinin oxidase/dehydrogenase	Schmülling T, Werner T, Riefler M, et al. Structure and function of cytokinin oxidase/dehydrogenase genes of maize, rice, Arabidopsis and other species[J]. Journal of plant research, 2003, 116(3): 241-252.
TraesCS3D01G475300	Bax inhibitor-1 family protein	Xu Q, Reed J C. Bax inhibitor-1, a mammalian apoptosis suppressor identified by functional screening in yeast[J]. Molecular cell, 1998, 1(3): 337-346.
TraesCS3D01G475900
TraesCS3D01G476000
TraesCS3D01G476100
TraesCS3D01G476300
TraesCS3D01G476400
TraesCS3D01G476200	Photosystem II reaction center protein Z	Wilson M I, Greenberg B M. Protection of the D1 photosystem II reaction center protein from degradation in ultraviolet radiation following adaptation of Brassica napus L. to growth in ultraviolet‐B[J]. Photochemistry and Photobiology, 1993, 57(3): 556-563.
TraesCS3D01G476500	Endo-1	Biely P, Mislovičová D, Toman R. Soluble chromogenic substrates for the assay of endo-1, 4-β-xylanases and endo-1, 4-β-glucanases[J]. Analytical biochemistry, 1985, 144(1): 142-146.
TraesCS3D01G476600
TraesCS3D01G478300
TraesCS3D01G474800	Expansin protein	Sampedro J, Cosgrove D J. The expansin superfamily[J]. Genome Biology, 2005, 6(12): 242-242.
TraesCS3D01G476700
TraesCS3D01G476800
TraesCS3D01G476900	NB-ARC domain disease resistance protein	Van Ooijen G, Mayr G, Kasiem M M A, et al. Structure–function analysis of the NB-ARC domain of plant disease resistance proteins[J]. Journal of experimental botany, 2008, 59(6): 1383-1397.
TraesCS3D01G477000	Co-chaperone protein HscB homolog	Bitto E, Bingman C A, Bittova L, et al. Structure of human J-type co-chaperone HscB reveals a tetracysteine metal-binding domain[J]. Journal of Biological Chemistry, 2008, 283(44): 30184-30192.
TraesCS3D01G477100	Endo-beta-1	Lashbrook C C, Gonzalez-Bosch C, Bennett A B. Two divergent endo-beta-1, 4-glucanase genes exhibit overlapping expression in ripening fruit and abscising flowers[J]. The Plant Cell, 1994, 6(10): 1485-1493.
TraesCS3D01G477200
TraesCS3D01G477500	Purple acid phosphatase 16	Hayman A R, Cox T M. Purple acid phosphatase of the human macrophage and osteoclast. Characterization, molecular properties, and crystallization of the recombinant di-iron-oxo protein secreted by baculovirus-infected insect cells[J]. Journal of Biological Chemistry, 1994, 269(2): 1294-1300.
TraesCS3D01G477600	VQ motif-containing protein	Jing Y , Lin R . The VQ Motif-Containing Protein Family of Plant-Specific Transcriptional Regulators[J]. Plant Physiology, 2015.
TraesCS3D01G477700	putative beta-1	Kamata T, Puzon W, Takada Y. Identification of putative ligand binding sites within I domain of integrin alpha 2 beta 1 (VLA-2, CD49b/CD29)[J]. Journal of Biological Chemistry, 1994, 269(13): 9659-9663.
TraesCS3D01G478500
TraesCS3D01G477800	DUF538 family protein	Gholizadeh A. Heterologous expression of stress-responsive DUF538 domain containing protein and its morpho-biochemical consequences[J]. The protein journal, 2011, 30(5): 351-358.
TraesCS3D01G477900
TraesCS3D01G478400
TraesCS3D01G478100	B3 domain-containing protein	Wang Y, Deng D, Zhang R, et al. Systematic analysis of plant-specific B3 domain-containing proteins based on the genome resources of 11 sequenced species[J]. Molecular biology reports, 2012, 39(5): 6267-6282.
TraesCS3D01G478600
TraesCS3D01G478700

## Sheet: KL-4A
the interval for QKL.sicau-4A
Gene ID in CS	Annotation	Reference
TraesCS4A01G050600	30S ribosomal protein S10	Das A, Ghosh B, Barik S, et al. Evidence that ribosomal protein S10 itself is a cellular component necessary for transcription antitermination by phage lambda N protein[J]. Proceedings of the National Academy of Sciences, 1985, 82(12): 4070-4074.
TraesCS4A01G050700	Cyclin	Glotzer M, Murray A W, Kirschner M W. Cyclin is degraded by the ubiquitin pathway[J]. Nature, 1991, 349(6305): 132.
TraesCS4A01G062400
TraesCS4A01G050800	2-oxoglutarate-dependent dioxygenase-related family protein	de Carolis E, de Luca V. 2-Oxoglutarate-dependent dioxygenase and related enzymes: biochemical characterization[J]. Phytochemistry, 1994, 36(5): 1093-1107.
TraesCS4A01G050900	Dirigent protein	Davin L B, Lewis N G. Dirigent proteins and dirigent sites explain the mystery of specificity of radical precursor coupling in lignan and lignin biosynthesis[J]. Plant physiology, 2000, 123(2): 453-462.
TraesCS4A01G051000	Alpha-L-fucosidase 2	Alhadeff J A, Miller A L, Wenaas H, et al. Human liver alpha-L-fucosidase. Purification, characterization, and immunochemical studies[J]. Journal of Biological Chemistry, 1975, 250(18): 7106-7113.
TraesCS4A01G051100	ABC subfamily C transporter	Tusnády G E, Bakos É, Váradi A, et al. Membrane topology distinguishes a subfamily of the ATP‐binding cassette (ABC) transporters[J]. FEBS letters, 1997, 402(1): 1-3.
TraesCS4A01G051200	Phosphomethylpyrimidine synthase	Abidin A A Z, Wong S, Rahman N S A, et al. Osmotic, oxidative and salinity stresses upregulate the expressions of thiamine (Vitamin B1) biosynthesis genes (THIC and THI1/THI4) in oil palm (Elaies guineensis)[J]. J. Oil Palm Res, 2016, 28(3): 308-319.
TraesCS4A01G051300	Cyclin family protein	Soni R, Carmichael J P, Shah Z H, et al. A family of cyclin D homologs from plants differentially controlled by growth regulators and containing the conserved retinoblastoma protein interaction motif[J]. The Plant Cell, 1995, 7(1): 85-103.
TraesCS4A01G051400	Mannose-1-phosphate guanyltransferase	Lukowitz W, Nickle T C, Meinke D W, et al. Arabidopsis cyt1 mutants are deficient in a mannose-1-phosphate guanylyltransferase and point to a requirement of N-linked glycosylation for cellulose biosynthesis[J]. Proceedings of the National Academy of Sciences, 2001, 98(5): 2262-2267.
TraesCS4A01G051500	RAN GTPase-activating protein 2	Hao W, Collier S M, Moffett P, et al. Structural basis for the interaction between the potato virus X resistance protein (Rx) and its cofactor Ran GTPase-activating protein 2 (RanGAP2)[J]. Journal of Biological Chemistry, 2013, 288(50): 35868-35876.
TraesCS4A01G051600	Protein transport protein GOT1	Damodaran S, Dlugos C A, Wood T D, et al. Effects of chronic ethanol administration on brain protein levels: a proteomic investigation using 2-D DIGE system[J]. European journal of pharmacology, 2006, 547(1-3): 75-82.
TraesCS4A01G051700	S-acyltransferase	Batistič O. Genomics and localization of the Arabidopsis DHHC-cysteine-rich domain S-acyltransferase protein family[J]. Plant physiology, 2012, 160(3): 1597-1612.
TraesCS4A01G051800	Myb/SANT-like DNA-binding domain protein	Barasch N, Gong X, Kwei K A, et al. Recurrent rearrangements of the Myb/SANT-like DNA-binding domain containing 3 gene (MSANTD3) in salivary gland acinic cell carcinoma[J]. PloS one, 2017, 12(2): e0171265.
TraesCS4A01G052800
TraesCS4A01G051900	Methionine--tRNA ligase	Rosa M D, SIGLER P B. Isolation and characterization of two methionine: tRNA ligases from wheat germ[J]. European journal of biochemistry, 1977, 78(1): 141-151.
TraesCS4A01G052000	Cysteine proteinase inhibitor	Barrett A J, Fritz H, Grubb A, et al. Nomenclature and classification of the proteins homologous with the cysteine-proteinase inhibitor chicken cystatin[J]. Biochemical Journal, 1986, 236(1): 312.
TraesCS4A01G052100
TraesCS4A01G052200	Beta-xylosidase, putative	Goujon T, Minic Z, El Amrani A, et al. AtBXL1, a novel higher plant (Arabidopsis thaliana) putative beta‐xylosidase gene, is involved in secondary cell wall metabolism and plant development[J]. The Plant Journal, 2003, 33(4): 677-690.
TraesCS4A01G052300	Protein weak chloroplast movement under blue light 1	Banaś A K, Aggarwal C, Łabuz J, et al. Blue light signalling in chloroplast movements[J]. Journal of experimental botany, 2012, 63(4): 1559-1574.
TraesCS4A01G052400	DUF538 family protein (Protein of unknown function, DUF538)	DUF538 family protein (Protein of unknown function, DUF538)
TraesCS4A01G052500	Nodulin-related protein 1, putative	Fu Q, Li S, Yu D. Identification of an Arabidopsis Nodulin-related protein in heat stress[J]. Molecules and cells, 2010, 29(1): 77-84.
TraesCS4A01G052600	Acetyl-CoA decarbonylase/synthase complex subunit alpha 1	Dai Y R, Reed D W, Millstein J H, et al. Acetyl-CoA decarbonylase/synthase complex from Archaeoglobus fulgidus[J]. Archives of microbiology, 1998, 169(6): 525-529.
TraesCS4A01G052700	Poly(A) RNA polymerase cid14	Keller C, Woolcock K, Hess D, et al. Proteomic and functional analysis of the noncanonical poly (A) polymerase Cid14[J]. Rna, 2010, 16(6): 1124-1129.
TraesCS4A01G052900	ATP synthase subunit b	Arechaga I, Miroux B, Karrasch S, et al. Characterisation of new intracellular membranes in Escherichia coli accompanying large scale over‐production of the b subunit of F1Fo ATP synthase[J]. FEBS letters, 2000, 482(3): 215-219.
TraesCS4A01G053000	B3 domain-containing protein	Wang Y, Cao L, Zhang Y, et al. Map-based cloning and characterization of BPH29, a B3 domain-containing recessive gene conferring brown planthopper resistance in rice[J]. Journal of experimental botany, 2015, 66(19): 6035-6045.
TraesCS4A01G055500
TraesCS4A01G055700
TraesCS4A01G053100	DNA-directed RNA polymerase subunit	Teeling H, Lombardot T, Bauer M, et al. Evaluation of the phylogenetic position of the planctomycete ‘Rhodopirellula baltica’SH 1 by means of concatenated ribosomal protein sequences, DNA-directed RNA polymerase subunit sequences and whole genome trees[J]. International journal of systematic and evolutionary microbiology, 2004, 54(3): 791-801.
TraesCS4A01G056600
TraesCS4A01G057000
TraesCS4A01G057100
TraesCS4A01G053200	G-patch domain containing protein, expressed	Aksaas A K, Larsen A C V, Rogne M, et al. G-patch domain and KOW motifs-containing protein, GPKOW; a nuclear RNA-binding protein regulated by protein kinase A[J]. Journal of molecular signaling, 2011, 6(1): 10.
TraesCS4A01G053300	Methionine import ATP-binding protein MetN	Price C E, Otto A, Fusetti F, et al. Differential effect of YidC depletion on the membrane proteome of Escherichia coli under aerobic and anaerobic growth conditions[J]. Proteomics, 2010, 10(18): 3235-3247.
TraesCS4A01G053400	E3 ubiquitin-protein ligase	Imai Y, Soda M, Takahashi R. Parkin suppresses unfolded protein stress-induced cell death through its E3 ubiquitin-protein ligase activity[J]. Journal of Biological Chemistry, 2000, 275(46): 35661-35664.
TraesCS4A01G053500	Glucan endo-1,3-beta-glucosidase 3	Sperisen C, Ryals J, Meins F. Comparison of cloned genes provides evidence for intergenomic exchange of DNA in the evolution of a tobacco glucan endo-1, 3-beta-glucosidase gene family[J]. Proceedings of the National Academy of Sciences, 1991, 88(5): 1820-1824.
TraesCS4A01G053600	Transforming growth factor-beta-induced protein ig-h3	Takács L, Boross P, TÖZSÉR J, et al. Transforming growth factor-β induced protein, βIG-H3, is present in degraded form and altered localization in lattice corneal dystrophy type I[J]. Experimental eye research, 1998, 66(6): 739-745.
TraesCS4A01G053700	Plant calmodulin-binding-like protein	Asano T, Masuda D, Yasuda M, et al. AtNFXL1, an Arabidopsis homologue of the human transcription factor NF‐X1, functions as a negative regulator of the trichothecene phytotoxin‐induced defense response[J]. The Plant Journal, 2008, 53(3): 450-464.
TraesCS4A01G053800	Remorin family protein	Marín M, Ott T. Phosphorylation of intrinsically disordered regions in remorin proteins[J]. Frontiers in plant science, 2012, 3: 86.
TraesCS4A01G053900	Pentatricopeptide repeat-containing protein	Bentolila S, Alfonso A A, Hanson M R. A pentatricopeptide repeat-containing gene restores fertility to cytoplasmic male-sterile plants[J]. Proceedings of the National Academy of Sciences, 2002, 99(16): 10887-10892.
TraesCS4A01G062500
TraesCS4A01G054000	Kinase-like	Song W Y, Wang G L, Chen L L, et al. A receptor kinase-like protein encoded by the rice disease resistance gene, Xa21[J]. science, 1995, 270(5243): 1804-1806.
TraesCS4A01G054300
TraesCS4A01G054100	ArfGap/RecO-like zinc finger domain-containing protein	Famula R A, Richards J H, Famula T R, et al. Association genetics of carbon isotope discrimination and leaf morphology in a breeding population of Juglans regia L[J]. Tree Genetics & Genomes, 2019, 15(1): 6.
TraesCS4A01G054200	galacturonic acid kinase	Yang T, Bar-Peled L, Gebhart L, et al. Identification of galacturonic acid-1-phosphate kinase, a new member of the GHMP kinase superfamily in plants, and comparison with galactose-1-phosphate kinase[J]. Journal of Biological Chemistry, 2009, 284(32): 21526-21535.
TraesCS4A01G054400	Heparanase	Vlodavsky I, Friedmann Y, Elkin M, et al. Mammalian heparanase: gene cloning, expression and function in tumor progression and metastasis[J]. Nature medicine, 1999, 5(7): 793.
TraesCS4A01G054500	Cytokinin riboside 5'-monophosphate phosphoribohydrolase	Tokunaga H, Kojima M, Kuroha T, et al. Arabidopsis lonely guy (LOG) multiple mutants reveal a central role of the LOG‐dependent pathway in cytokinin activation[J]. The Plant Journal, 2012, 69(2): 355-365.
TraesCS4A01G054600	Transcription factor GTE8	Pool-Zobel B L. Tanja Kautenburger1, Thomas W. Becker2[J]. Prevention of Cancer: New Research, 2008: 143.
TraesCS4A01G054700	Gamma-aminobutyric acid receptor subunit rho-1	Farooq M, Hozzein W N, Elsayed E A, et al. Identification of histone deacetylase 1 protein complexes in liver cancer cells[J]. Asian Pacific Journal of Cancer Prevention, 2013, 14(2): 915-921.
TraesCS4A01G054800	T-complex protein 1 subunit beta	Coghlin C, Carpenter B, Dundas S R, et al. Characterization and over‐expression of chaperonin t‐complex proteins in colorectal cancer[J]. The Journal of Pathology: A Journal of the Pathological Society of Great Britain and Ireland, 2006, 210(3): 351-357.
TraesCS4A01G054900	Hexosyltransferase	Romanow A, Haselhorst T, Stummeyer K, et al. Biochemical and biophysical characterization of the sialyl-/hexosyltransferase synthesizing the meningococcal serogroup W135 heteropolysaccharide capsule[J]. Journal of Biological Chemistry, 2013, 288(17): 11718-11730.
TraesCS4A01G055000	Leucine-rich repeat receptor protein kinase	Li J, Chory J. A putative leucine-rich repeat receptor kinase involved in brassinosteroid signal transduction[J]. Cell, 1997, 90(5): 929-938.
TraesCS4A01G055100	Glycosyltransferase	Moloney D J, Panin V M, Johnston S H, et al. Fringe is a glycosyltransferase that modifies Notch[J]. Nature, 2000, 406(6794): 369.
TraesCS4A01G055200	Alpha amylase inhibitor protein	Fränken J, Stephan U, Meyer H E, et al. Identification of alpha-amylase inhibitor as a major allergen of wheat flour[J]. International archives of allergy and immunology, 1994, 104(2): 171-174.
TraesCS4A01G055300	Tyrosine-specific transport protein, putative	Wookey P J, Pittard A J. DNA sequence of the gene (tyrP) encoding the tyrosine-specific transport system of Escherichia coli[J]. Journal of bacteriology, 1988, 170(10): 4946-4949.
TraesCS4A01G055400	Leucine-rich repeat (LRR) family protein	Kajava A V. Structural diversity of leucine-rich repeat proteins[J]. 1998.
TraesCS4A01G055600	Terpene synthase, putative	Tholl D. Terpene synthases and the regulation, diversity and biological roles of terpene metabolism[J]. Current opinion in plant biology, 2006, 9(3): 297-304.
TraesCS4A01G055800	SNAP25 homologous protein SNAP33	Kwon C, Neu C, Pajonk S, et al. Co-option of a default secretory pathway for plant immune responses[J]. Nature, 2008, 451(7180): 835.
TraesCS4A01G055900	Helicase/SANT-associated, DNA binding protein	Szerlong H, Hinata K, Viswanathan R, et al. The HSA domain binds nuclear actin-related proteins to regulate chromatin-remodeling ATPases[J]. Nature structural & molecular biology, 2008, 15(5): 469.
TraesCS4A01G056000	Protein CHUP1, chloroplastic	Oikawa K, Yamasato A, Kong S G, et al. Chloroplast outer envelope protein CHUP1 is essential for chloroplast anchorage to the plasma membrane and chloroplast movement[J]. Plant physiology, 2008, 148(2): 829-842.
TraesCS4A01G056100	TPX2 (Targeting protein for Xklp2) family protein	Liang B, Zheng W, Fang L, et al. Overexpressed targeting protein for Xklp2 (TPX2) serves as a promising prognostic marker and therapeutic target for gastric cancer[J]. Cancer biology & therapy, 2016, 17(8): 824-832.
TraesCS4A01G056200	Mitochondrial-processing peptidase beta subunit	Taylor A B, Smith B S, Kitada S, et al. Crystal structures of mitochondrial processing peptidase reveal the mode for specific cleavage of import signal sequences[J]. Structure, 2001, 9(7): 615-625.
TraesCS4A01G056300	Beta-glucosidase	Mattiacci L, Dicke M, Posthumus M A. beta-Glucosidase: an elicitor of herbivore-induced plant odor that attracts host-searching parasitic wasps[J]. Proceedings of the National Academy of Sciences of the United States of America, 1995, 92(6): 2036.
TraesCS4A01G056400
TraesCS4A01G056500	Protein transport protein Sec61 subunit alpha	Romisch K. Surfing the Sec61 channel: bidirectional protein translocation across the ER membrane[J]. J Cell Sci, 1999, 112(23): 4185-4191.
TraesCS4A01G056700	Cyclin-dependent kinase 2-interacting protein	Wang Y, Wang Y, Xu Y, et al. Hepatitis C virus NS5B protein delays s phase progression in human hepatocyte-derived cells by relocalizing cyclin-dependent kinase 2-interacting protein (CINP)[J]. Journal of Biological Chemistry, 2011, 286(30): 26603-26615.
TraesCS4A01G056800	Dentin sialophosphoprotein-related, putative	Fabi J P, Mendes L R B C, Lajolo F M, et al. Transcript profiling of papaya fruit reveals differentially expressed genes associated with fruit ripening[J]. Plant science, 2010, 179(3): 225-233.
TraesCS4A01G056900	Disease resistance protein (TIR-NBS-LRR class) family	Gassmann W, Hinsch M E, Staskawicz B J. The Arabidopsis RPS4 bacterial‐resistance gene is a member of the TIR‐NBS‐LRR family of disease‐resistance genes[J]. The Plant Journal, 1999, 20(3): 265-277.
TraesCS4A01G057200	ATP-dependent RNA helicase	de la Cruz J, Kressler D, Tollervey D, et al. Dob1p (Mtr4p) is a putative ATP‐dependent RNA helicase required for the 3′ end formation of 5.8 S rRNA in Saccharomyces cerevisiae[J]. The EMBO journal, 1998, 17(4): 1128-1140.
TraesCS4A01G057300	RING/FYVE/PHD zinc finger superfamily protein	Cluster A. Cluster of co-localizing genes: annotation and expression[J]. alcohol, 1(1): 1.
TraesCS4A01G057400	Protein root UVB sensitive 3	Sakamoto A N, Lan V T T, Puripunyavanich V, et al. A UVB‐hypersensitive mutant in Arabidopsis thaliana is defective in the DNA damage response[J]. The Plant Journal, 2009, 60(3): 509-517.
TraesCS4A01G057500	Histone H3	Cao R, Wang L, Wang H, et al. Role of histone H3 lysine 27 methylation in Polycomb-group silencing[J]. Science, 2002, 298(5595): 1039-1043.
TraesCS4A01G057600	Protein RIK	Myung J, Gulesserian T, Fountoulakis M, et al. Deranged hypothetical proteins Rik protein, Nit protein 2 and mitochondrial inner membrane protein, Mitofilin, in fetal Down syndrome brain[J]. Cellular and molecular biology (Noisy-le-Grand, France), 2003, 49(5): 739-746.
TraesCS4A01G057700	Purple acid phosphatase	Strater N, Klabunde T, Tucker P, et al. Crystal structure of a purple acid phosphatase containing a dinuclear Fe (III)-Zn (II) active site[J]. Science, 1995, 268(5216): 1489-1492.
TraesCS4A01G057800	Ninja-family protein	Qiang Y, Xie H, Qiao S, et al. Development of microsatellite markers for Carallia brachiata (Rhizophoraceae)[J]. Applications in plant sciences, 2015, 3(3): 1400125.
TraesCS4A01G058100
TraesCS4A01G057900	Hemocyte protein-glutamine gamma-glutamyltransferase	Lorenzini D M, da Silva Jr P I, Soares M B, et al. Discovery of immune-related genes expressed in hemocytes of the tarantula spider Acanthoscurria gomesiana[J]. Developmental & Comparative Immunology, 2006, 30(6): 545-556.
TraesCS4A01G058000	Replication protein A 70 kDa DNA-binding subunit	Erdile L F, Heyer W D, Kolodner R, et al. Characterization of a cDNA encoding the 70-kDa single-stranded DNA-binding subunit of human replication protein A and the role of the protein in DNA replication[J]. Journal of Biological Chemistry, 1991, 266(18): 12090-12098.
TraesCS4A01G058200	Digalactosyldiacylglycerol synthase (Chloroplastic)	Kelly A A, Froehlich J E, Dörmann P. Disruption of the two digalactosyldiacylglycerol synthase genes DGD1 and DGD2 in Arabidopsis reveals the existence of an additional enzyme of galactolipid synthesis[J]. The Plant Cell, 2003, 15(11): 2694-2706.
TraesCS4A01G058300	Expansin	Fleming A J, McQueen-Mason S, Mandel T, et al. Induction of leaf primordia by the cell wall protein expansin[J]. Science, 1997, 276(5317): 1415-1418.
TraesCS4A01G058400
TraesCS4A01G058500	SPOC domain / Transcription elongation factor S-II protein	Yang H, Liu J, Huang S, et al. Selection and evaluation of novel reference genes for quantitative reverse transcription PCR (qRT-PCR) based on genome and transcriptome data in Brassica napus L[J]. Gene, 2014, 538(1): 113-122.
TraesCS4A01G058600	Mitotic checkpoint protein bub3.1	Logarinho E, Resende T, Torres C, et al. The human spindle assembly checkpoint protein Bub3 is required for the establishment of efficient kinetochore–microtubule attachments[J]. Molecular biology of the cell, 2008, 19(4): 1798-1813.
TraesCS4A01G058700	GDP-mannose transporter	Gao X D, Dean N. Distinct protein domains of the yeast Golgi GDP-mannose transporter mediate oligomer assembly and export from the endoplasmic reticulum[J]. Journal of Biological Chemistry, 2000, 275(23): 17718-17727.
TraesCS4A01G058800	Protein CRABS CLAW, putative	Bowman J L, Smyth D R. CRABS CLAW, a gene that regulates carpel and nectary development in Arabidopsis, encodes a novel protein with zinc finger and helix-loop-helix domains[J]. Development, 1999, 126(11): 2387-2396.
TraesCS4A01G058900	MADS-box transcription factor	Par̆enicová L, De Folter S, Kieffer M, et al. Molecular and phylogenetic analyses of the complete MADS-box transcription factor family in Arabidopsis: new openings to the MADS world[J]. The Plant Cell, 2003, 15(7): 1538-1551.
TraesCS4A01G059000	Non-specific serine/threonine protein kinase	COLLINS S P, REOMA J L, UHLER M D. LKB1, a novel serine/threonine protein kinase and potential tumour suppressor, is phosphorylated by cAMP-dependent protein kinase (PKA) and prenylated in vivo[J]. Biochemical Journal, 2000, 345(3): 673-680.
TraesCS4A01G059100	basic helix-loop-helix (bHLH) DNA-binding superfamily protein	Jones S. An overview of the basic helix-loop-helix proteins[J]. Genome biology, 2004, 5(6): 226.
TraesCS4A01G060200
TraesCS4A01G059200	Protein DETOXIFICATION	Demirevska-Kepova K, Simova-Stoilova L, Stoyanova Z P, et al. Cadmium stress in barley: growth, leaf pigment, and protein composition and detoxification of reactive oxygen species[J]. Journal of plant nutrition, 2006, 29(3): 451-468.
TraesCS4A01G059300	Maf family protein, putative, expressed	Itoh K, Igarashi K, Hayashi N, et al. Cloning and characterization of a novel erythroid cell-derived CNC family transcription factor heterodimerizing with the small Maf family proteins[J]. Molecular and cellular biology, 1995, 15(8): 4184-4193.
TraesCS4A01G059400	Poly [ADP-ribose] polymerase	Bryant H E, Schultz N, Thomas H D, et al. Specific killing of BRCA2-deficient tumours with inhibitors of poly (ADP-ribose) polymerase[J]. Nature, 2005, 434(7035): 913.
TraesCS4A01G059500	Inositol-tetrakisphosphate 1-kinase	Xiaonian Y, SHEARS S B. Multitasking in signal transduction by a promiscuous human Ins (3, 4, 5, 6) P4 1-kinase/Ins (1, 3, 4) P3 5/6-kinase[J]. Biochemical Journal, 2000, 351(3): 551-555.
TraesCS4A01G059600	Homeobox-leucine zipper protein	Schena M, Davis R W. Structure of homeobox-leucine zipper genes suggests a model for the evolution of gene families[J]. Proceedings of the National Academy of Sciences, 1994, 91(18): 8393-8397.
TraesCS4A01G059700	UvrABC system protein C	Yeung A T, Mattes W B, Oh E Y, et al. Enzymatic properties of purified Escherichia coli uvrABC proteins[J]. Proceedings of the National Academy of Sciences, 1983, 80(20): 6157-6161.
TraesCS4A01G059800	Branched-chain-amino-acid aminotransferase	Harper A E, Miller R H, Block K P. Branched-chain amino acid metabolism[J]. Annual review of nutrition, 1984, 4(1): 409-454.
TraesCS4A01G059900	Squalene monooxygenase	Gupta N, Porter T D. Garlic and garlic-derived compounds inhibit human squalene monooxygenase[J]. The Journal of nutrition, 2001, 131(6): 1662-1667.
TraesCS4A01G060000	Enolase	Tapia F J, Barbosa A J A, Marangos P J, et al. Neuron-specific enolase is produced by neuroendocrine tumours[J]. The Lancet, 1981, 317(8224): 808-811.
TraesCS4A01G060100	Short hypocotyl in white light1 protein	Bhatia S, Gangappa S N, Kushwaha R, et al. SHORT HYPOCOTYL IN WHITE LIGHT1, a serine-arginine-aspartate-rich protein in Arabidopsis, acts as a negative regulator of photomorphogenic growth[J]. Plant physiology, 2008, 147(1): 169-178.
TraesCS4A01G060300	F-box family protein, putative	Dharmasiri N, Dharmasiri S, Weijers D, et al. Plant development is regulated by a family of auxin receptor F box proteins[J]. Developmental cell, 2005, 9(1): 109-119.
TraesCS4A01G060400	AP2-like ethylene-responsive transcription factor	Djemal R , Khoudi H . Isolation and molecular characterization of a novel WIN1/SHN1 ethylene-responsive transcription factor TdSHN1 from durum wheat ( Triticum turgidum. L. subsp. durum )[J]. Protoplasma, 2015, 252(6):1461-1473.
TraesCS4A01G060500	SNF2 domain-containing protein / helicase domain-containing protein / zinc finger protein-like protein	Casati P, Walbot V. Maize lines expressing RNAi to chromatin remodeling factors are similarly hypersensitive to UV-B radiation but exhibit distinct transcriptome responses[J]. Epigenetics, 2008, 3(4): 216-229.
TraesCS4A01G060600	Phytosulfokines 3 family protein	Sauter M. Phytosulfokine peptide signalling[J]. Journal of Experimental Botany, 2015, 66(17): 5161-5169.
TraesCS4A01G060700	GTP-binding protein	Ridley A J, Paterson H F, Johnston C L, et al. The small GTP-binding protein rac regulates growth factor-induced membrane ruffling[J]. Cell, 1992, 70(3): 401-410.
TraesCS4A01G060800	U-box domain-containing protein	Azevedo C, Santos-Rosa M J, Shirasu K. The U-box protein family in plants[J]. Trends in plant science, 2001, 6(8): 354-358.
TraesCS4A01G060900	Lecithin-cholesterol acyltransferase-like 1	Oelkers P, Tinkelenberg A, Erdeniz N, et al. A lecithin cholesterol acyltransferase-like gene mediates diacylglycerol esterification in yeast[J]. Journal of Biological Chemistry, 2000, 275(21): 15609-15612.
TraesCS4A01G061000	Heptahelical transmembrane protein 4	Hsieh M H, Goodman H M. A novel gene family in Arabidopsis encoding putative heptahelical transmembrane proteins homologous to human adiponectin receptors and progestin receptors[J]. Journal of experimental botany, 2005, 56(422): 3137-3147.
TraesCS4A01G061100	Formin-like protein	Banno H, Chua N H. Characterization of the Arabidopsis formin-like protein AFH1 and its interacting protein[J]. Plant and Cell Physiology, 2000, 41(5): 617-626.
TraesCS4A01G061200	Pathogenesis-related thaumatin-like protein protein	Vigers A J, Wiedemann S, Roberts W K, et al. Thaumatin-like pathogenesis-related proteins are antifungal[J]. Plant Science, 1992, 83(2): 155-161.
TraesCS4A01G061300	Retrovirus-related Pol polyprotein from transposon TNT 1-94	He R, Zhu X, Li Q, et al. Transcriptome analysis for the restrained stem development of the wheat mutant dms[J]. Ciência Rural, 2017, 47(12).
TraesCS4A01G061400	Receptor-like protein kinase	Li J, Wen J, Lease K A, et al. BAK1, an Arabidopsis LRR receptor-like protein kinase, interacts with BRI1 and modulates brassinosteroid signaling[J]. Cell, 2002, 110(2): 213-222.
TraesCS4A01G061500	RING/U-box superfamily protein	Vander Kooi C W, Ohi M D, Rosenberg J A, et al. The Prp19 U-box crystal structure suggests a common dimeric architecture for a class of oligomeric E3 ubiquitin ligases[J]. Biochemistry, 2006, 45(1): 121-130.
TraesCS4A01G061600	electron transporter, putative (Protein of unknown function, DUF547)	Couturier J, Jacquot J P, Rouhier N. Evolution and diversity of glutaredoxins in photosynthetic organisms[J]. Cellular and Molecular Life Sciences, 2009, 66(15): 2539-2557.
TraesCS4A01G061700	Non-symbiotic hemoglobin	Shimoda Y, Nagata M, Suzuki A, et al. Symbiotic rhizobium and nitric oxide induce gene expression of non-symbiotic hemoglobin in Lotus japonicus[J]. Plant and Cell Physiology, 2005, 46(1): 99-107.
TraesCS4A01G061800	Allene oxide synthase	Laudert D, Weiler E W. Allene oxide synthase: a major control point in Arabidopsis thaliana octadecanoid signalling[J]. The Plant Journal, 1998, 15(5): 675-684.
TraesCS4A01G061900
TraesCS4A01G062000	Kinase, putative	Li J, Chory J. A putative leucine-rich repeat receptor kinase involved in brassinosteroid signal transduction[J]. Cell, 1997, 90(5): 929-938.
TraesCS4A01G062100	Conserved oligomeric Golgi complex subunit 6	Lübbehusen J, Thiel C, Rind N, et al. Fatal outcome due to deficiency of subunit 6 of the conserved oligomeric Golgi complex leading to a new type of congenital disorders of glycosylation[J]. Human molecular genetics, 2010, 19(18): 3623-3633.
TraesCS4A01G062200	Nuclear pore complex protein NUP133	Berke I C, Boehmer T, Blobel G, et al. Structural and functional analysis of Nup133 domains reveals modular building blocks of the nuclear pore complex[J]. J Cell Biol, 2004, 167(4): 591-597.
TraesCS4A01G062300	Mitochondrial carrier family	Boss O, Samec S, Paoloni-Giacobino A, et al. Uncoupling protein‐3: a new member of the mitochondrial carrier family with tissue‐specific expression[J]. FEBS letters, 1997, 408(1): 39-42.
TraesCS4A01G062600	protein kinase family protein	Manning G, Whyte D B, Martinez R, et al. The protein kinase complement of the human genome[J]. Science, 2002, 298(5600): 1912-1934.
TraesCS4A01G062700	Phosphomannomutase	Van Schaftingen E, Jaeken J. Phosphomannomutase deficiency is a cause of carbohydrate-deficient glycoprotein syndrome type I[J]. FEBS letters, 1995, 377(3): 318-320.
TraesCS4A01G062800	Heat shock transcription factor	Morimoto R I. Regulation of the heat shock transcriptional response: cross talk between a family of heat shock factors, molecular chaperones, and negative regulators[J]. Genes & development, 1998, 12(24): 3788-3796.
TraesCS4A01G062900	Trehalose-6-phosphate synthase	Romero C, Bellés J M, Vayá J L, et al. Expression of the yeast trehalose-6-phosphate synthase gene in transgenic tobacco plants: pleiotropic phenotypes include drought tolerance[J]. Planta, 1997, 201(3): 293-297.
TraesCS4A01G063000	Major facilitator superfamily transporter	Yan N. Structural advances for the major facilitator superfamily (MFS) transporters[J]. Trends in biochemical sciences, 2013, 38(3): 151-159.
TraesCS4A01G063100	Two-component response regulator	West A H, Stock A M. Histidine kinases and response regulator proteins in two-component signaling systems[J]. Trends in biochemical sciences, 2001, 26(6): 369-376.
TraesCS4A01G063200	UDP-3-O-acyl N-acetylglucosamine deacetylase	McClure C P, Rusche K M, Peariso K, et al. EXAFS studies of the zinc sites of UDP-(3-O-acyl)-N-acetylglucosamine deacetylase (LpxC)[J]. Journal of inorganic biochemistry, 2003, 94(1-2): 78-85.
TraesCS4A01G063300	Kinesin light chain 3	Morfini G, Szebenyi G, Elluru R, et al. Glycogen synthase kinase 3 phosphorylates kinesin light chains and negatively regulates kinesin‐based motility[J]. The EMBO journal, 2002, 21(3): 281-293.
TraesCS4A01G063400	Nuclear pore complex protein Nup155	Radu A, Blobel G, Wozniak R W. Nup155 is a novel nuclear pore complex protein that contains neither repetitive sequence motifs nor reacts with WGA[J]. The Journal of cell biology, 1993, 121(1): 1-9.
TraesCS4A01G063500	calcium/calcium/calmodulin-dependent Serine/Threonine-kinase	Rodriguez-Mora O, LaHair M M, Howe C J, et al. Calcium/calmodulin-dependent protein kinases as potential targets in cancer therapy[J]. Expert opinion on therapeutic targets, 2005, 9(4): 791-808.
TraesCS4A01G063600	Early light-induced protein	Hutin C, Nussaume L, Moise N, et al. Early light-induced proteins protect Arabidopsis from photooxidative stress[J]. Proceedings of the National Academy of Sciences, 2003, 100(8): 4921-4926.

## Sheet: KL-6A
the interval for QKL.sicau-6A
Gene ID in CS	Annotation	Reference
TraesCS6A01G013300	Two-component response regulator	West A H, Stock A M. Histidine kinases and response regulator proteins in two-component signaling systems[J]. Trends in biochemical sciences, 2001, 26(6): 369-376.
TraesCS6A01G013400	Centromere O	Foltz D R, Jansen L E T, Bailey A O, et al. Centromere-specific assembly of CENP-a nucleosomes is mediated by HJURP[J]. Cell, 2009, 137(3): 472-484.
TraesCS6A01G013500	Leucine-rich repeat receptor-like protein kinase family protein	Gou X, He K, Yang H, et al. Genome-wide cloning and sequence analysis of leucine-rich repeat receptor-like protein kinase genes in Arabidopsis thaliana[J]. Bmc Genomics, 2010, 11(1):1-15.
TraesCS6A01G013600	Nitric oxide synthase 1	Ju H, Zou R, Venema V J, et al. Direct interaction of endothelial nitric-oxide synthase and caveolin-1 inhibits synthase activity[J]. Journal of Biological Chemistry, 1997, 272(30): 18522-18525.
TraesCS6A01G013700	Ubiquitin family protein	Hatakeyama S, Yada M, Matsumoto M, et al. U box proteins as a new family of ubiquitin-protein ligases[J]. Journal of Biological Chemistry, 2001, 276(35): 33111-33120.
TraesCS6A01G013800	Large proline-rich protein BAG6	Binici J, Koch J. BAG-6, a jack of all trades in health and disease[J]. Cellular and molecular life sciences, 2014, 71(10): 1829-1837.
TraesCS6A01G013900	Outer envelope protein 61	Rosenbusch J P. Characterization of the major envelope protein from Escherichia coli regular arrangement on the peptidoglycan and unusual dodecyl sulfate binding[J]. Journal of Biological Chemistry, 1974, 249(24): 8019-8029.
TraesCS6A01G014000	RING/FYVE/PHD zinc finger superfamily protein	Yamasaki K, Kigawa T, Inoue M, et al. A novel zinc-binding motif revealed by solution structures of DNA-binding domains of Arabidopsis SBP-family transcription factors[J]. Journal of molecular biology, 2004, 337(1): 49-63.
TraesCS6A01G014100	Polygalacturonase non-catalytic protein	De Lorenzo G, Cervone F, Bellincampi D, et al. Polygalacturonase, PGIP and oligogalacturonides in cell-cell communication[J]. 1994.
TraesCS6A01G014200	BTB/POZ domain containing protein	Daniel J M, Reynolds A B. The catenin p120 ctn interacts with Kaiso, a novel BTB/POZ domain zinc finger transcription factor[J]. Molecular and cellular biology, 1999, 19(5): 3614-3623.
TraesCS6A01G014300	Disease resistance protein (NBS-LRR class) family	Gassmann W, Hinsch M E, Staskawicz B J. The Arabidopsis RPS4 bacterial‐resistance gene is a member of the TIR‐NBS‐LRR family of disease‐resistance genes[J]. The Plant Journal, 1999, 20(3): 265-277.
TraesCS6A01G014700
TraesCS6A01G014400	Eukaryotic translation initiation factor 4E-1B	Cook J M. Zygote arrest (Zar) protein-mediated translational control in Xenopus laevis development: Requirement for the poly (A) tail and protein interactions[M]. University of Colorado at Denver, 2015.
TraesCS6A01G014500	Pentatricopeptide repeat-containing protein	Bentolila S, Alfonso A A, Hanson M R. A pentatricopeptide repeat-containing gene restores fertility to cytoplasmic male-sterile plants[J]. Proceedings of the National Academy of Sciences, 2002, 99(16): 10887-10892.
TraesCS6A01G014600
TraesCS6A01G014800
TraesCS6A01G014900
TraesCS6A01G015000
TraesCS6A01G015100	Acetate kinase	Grundy F J, Waters D A, Allen S H, et al. Regulation of the Bacillus subtilis acetate kinase gene by CcpA[J]. Journal of bacteriology, 1993, 175(22): 7348-7355.
TraesCS6A01G015300	Chalcone synthase	Austin M B, Noel J P. The chalcone synthase superfamily of type III polyketide synthases[J]. Natural product reports, 2003, 20(1): 79-110.
TraesCS6A01G015500
TraesCS6A01G015400	O-methyltransferase family protein	Li E, Bestor T H, Jaenisch R. Targeted mutation of the DNA methyltransferase gene results in embryonic lethality[J]. Cell, 1992, 69(6): 915-926.
TraesCS6A01G015600	Peptidylprolyl isomerase	Riggs D L, Roberts P J, Chirillo S C, et al. The Hsp90‐binding peptidylprolyl isomerase FKBP52 potentiates glucocorticoid signaling in vivo[J]. The EMBO journal, 2003, 22(5): 1158-1167.
TraesCS6A01G015800	Cytosine-specific methyltransferase	Li E, Bestor T H, Jaenisch R. Targeted mutation of the DNA methyltransferase gene results in embryonic lethality[J]. Cell, 1992, 69(6): 915-926.
TraesCS6A01G015200	Mitochondrial transcription termination factor-like	Chen Y, Zhou G, Yu M, et al. Cloning and functional analysis of human mTERFL encoding a novel mitochondrial transcription termination factor-like protein[J]. Biochemical and biophysical research communications, 2005, 337(4): 1112-1118.
TraesCS6A01G015900
TraesCS6A01G016000
TraesCS6A01G016100
TraesCS6A01G016400
TraesCS6A01G016500
TraesCS6A01G016600
TraesCS6A01G016700
TraesCS6A01G016800
TraesCS6A01G017000
TraesCS6A01G017400
TraesCS6A01G017600
TraesCS6A01G017700
TraesCS6A01G018100
TraesCS6A01G018300
TraesCS6A01G019500
TraesCS6A01G019600
TraesCS6A01G019800
TraesCS6A01G019900
TraesCS6A01G020000
TraesCS6A01G020300
TraesCS6A01G018200	Glycosyltransferase	Ünligil U M, Rini J M. Glycosyltransferase structure and mechanism[J]. Current opinion in structural biology, 2000, 10(5): 510-517.
TraesCS6A01G017900
TraesCS6A01G018000
TraesCS6A01G016200	Ubiquitin-conjugating enzyme E2	Lorick K L, Jensen J P, Fang S, et al. RING fingers mediate ubiquitin-conjugating enzyme (E2)-dependent ubiquitination[J]. Proceedings of the National Academy of Sciences, 1999, 96(20): 11364-11369.
TraesCS6A01G016300	Endosperm transfer cell specific PR9	Kumlehn J, Hensel G. Genetic transformation technology in the Triticeae[J]. Breeding science, 2009, 59(5): 553-560.
TraesCS6A01G017100	Pyruvate dehydrogenase E1 component subunit alpha	Lessard I A, Perham R N. Expression in Escherichia coli of genes encoding the E1 alpha and E1 beta subunits of the pyruvate dehydrogenase complex of Bacillus stearothermophilus and assembly of a functional E1 component (alpha 2 beta 2) in vitro[J]. Journal of Biological Chemistry, 1994, 269(14): 10378-10383.
TraesCS6A01G015700	F-box family protein	Dharmasiri N, Dharmasiri S, Weijers D, et al. Plant development is regulated by a family of auxin receptor F box proteins[J]. Developmental cell, 2005, 9(1): 109-119.
TraesCS6A01G017200
TraesCS6A01G017800
TraesCS6A01G016900	SKP1-like protein	Zhao L, Huang J, Zhao Z, et al. The Skp1‐like protein SSK1 is required for cross‐pollen compatibility in S‐RNase‐based self‐incompatibility[J]. The Plant Journal, 2010, 62(1): 52-63.
TraesCS6A01G017300
TraesCS6A01G017500	Nitrate reductase	Jaworski E G. Nitrate reductase assay in intact plant tissues[J]. Biochemical and biophysical research communications, 1971, 43(6): 1274-1279.
TraesCS6A01G018400	Receptor-kinase	Endre G, Kereszt A, Kevei Z, et al. A receptor kinase gene regulating symbiotic nodule development[J]. Nature, 2002, 417(6892): 962.
TraesCS6A01G018500	Protein kinase-like	Song W Y, Wang G L, Chen L L, et al. A receptor kinase-like protein encoded by the rice disease resistance gene, Xa21[J]. science, 1995, 270(5243): 1804-1806.
TraesCS6A01G020100
TraesCS6A01G018600	Aspartate aminotransferase	Bergmeyer H U, Scheibe P, Wahlefeld A W. Optimization of methods for aspartate aminotransferase and alanine aminotransferase[J]. Clinical chemistry, 1978, 24(1): 58-73.
TraesCS6A01G018700	Ripening related protein family	D'avino R, Bernardi M L, Wallner M, et al. Kiwifruit Act d 11 is the first member of the ripening‐related protein family identified as an allergen[J]. Allergy, 2011, 66(7): 870-877.
TraesCS6A01G018800
TraesCS6A01G018900
TraesCS6A01G019000
TraesCS6A01G019100
TraesCS6A01G019200	PH01B035L11.2 protein	Malagola M, Papayannidis C, Baccarani M. Tyrosine kinase inhibitors in Ph+ acute lymphoblastic leukaemia: facts and perspectives[J]. Annals of hematology, 2016, 95(5): 681-693.
TraesCS6A01G019300	RNA binding	Bandziulis R J, Swanson M S, Dreyfuss G. RNA-binding proteins as developmental regulators[J]. Genes Dev, 1989, 3(4): 431-437.
TraesCS6A01G019400	COPII coat assembly protein sec16	Yorimitsu T, Sato K. Insights into structural and regulatory roles of Sec16 in COPII vesicle formation at ER exit sites[J]. Molecular biology of the cell, 2012, 23(15): 2930-2942.
TraesCS6A01G019700	3-oxoacyl-reductase	KATIYAR S S, PAN D, PORTER J W. Inactivation of 3‐Oxoacyl Synthetase Activity of Pigeon Liver Fatty Acid Synthetase by S‐(4‐Bromo‐2, 3‐dioxobutyl)‐coenzyme A[J]. European journal of biochemistry, 1983, 130(1): 177-184.
TraesCS6A01G020200	2-oxoglutarate (2OG) and Fe(II)-dependent oxygenase superfamily protein	Aravind L, Koonin E V. The DNA-repair protein AlkB, EGL-9, and leprecan define new families of 2-oxoglutarate-and iron-dependent dioxygenases[J]. Genome biology, 2001, 2(3): research0007. 1.

## Sheet: KL-7A
the interval for QKL.sicau-7A
Gene ID in CS	Annotation	Reference
TraesCS7A01G128500	Zinc finger family protein	Kilpatrick C L, Murakami S, Feng M, et al. Dissociation of Golgi-associated DHHC-type zinc finger protein (GODZ)-and Sertoli cell gene with a zinc finger domain-β (SERZ-β)-mediated palmitoylation by loss of function analyses in knock-out mice[J]. Journal of Biological Chemistry, 2016, 291(53): 27371-27386.
TraesCS7A01G128700
TraesCS7A01G128600	Histone-lysine N-methyltransferase	Li E, Bestor T H, Jaenisch R. Targeted mutation of the DNA methyltransferase gene results in embryonic lethality[J]. Cell, 1992, 69(6): 915-926.
TraesCS7A01G128800	Ethylene-responsive transcription factor	Ohta M, Ohme‐Takagi M, Shinshi H. Three ethylene‐responsive transcription factors in tobacco with distinct transactivation functions[J]. The Plant Journal, 2000, 22(1): 29-38.
TraesCS7A01G128900	SPT2 chromatin protein	Guo T, Yin R X, Bin Y, et al. Association of the SPT2 chromatin protein domain containing 1 gene rs17579600 polymorphism and serum lipid traits[J]. International journal of clinical and experimental pathology, 2015, 8(10): 12995.
TraesCS7A01G129000	Auxin-responsive protein	Ulmasov T, Murfett J, Hagen G, et al. Aux/IAA proteins repress expression of reporter genes containing natural and highly active synthetic auxin response elements[J]. The Plant Cell, 1997, 9(11): 1963-1971.
TraesCS7A01G129100	Translation initiation factor IF-2	LA TEANA A, GUALERZI C O, DAHLBERG A E. Initiation factor IF 2 binds to the α-sarcin loop and helix 89 of Escherichia coli 23S ribosomal RNA[J]. Rna, 2001, 7(8): 1173-1179.
TraesCS7A01G129200	F-box protein	Dharmasiri N, Dharmasiri S, Estelle M. The F-box protein TIR1 is an auxin receptor[J]. Nature, 2005, 435(7041): 441.
TraesCS7A01G130200
TraesCS7A01G129300	Receptor-like kinase	Shiu S H, Bleecker A B. Receptor-like kinases from Arabidopsis form a monophyletic gene family related to animal receptor kinases[J]. Proceedings of the National Academy of Sciences, 2001, 98(19): 10763-10768.
TraesCS7A01G129400	Embryogenesis transmembrane protein-like	Tanaka S S, Nagamatsu G, Tokitake Y, et al. Regulation of expression of mouse interferon‐induced transmembrane protein like gene‐3, Ifitm3 (mil‐1, fragilis), in germ cells[J]. Developmental dynamics: an official publication of the American Association of Anatomists, 2004, 230(4): 651-659.
TraesCS7A01G129500	Glutathione S-transferase	Smith D B, Johnson K S. Single-step purification of polypeptides expressed in Escherichia coli as fusions with glutathione S-transferase[J]. Gene, 1988, 67(1): 31-40.
TraesCS7A01G129600	Protein FAR1-RELATED SEQUENCE 6	Ma L, Li G. FAR1-RELATED SEQUENCE (FRS) and FRS-RELATED FACTOR (FRF) Family Proteins in Arabidopsis Growth and Development[J]. Frontiers in plant science, 2018, 9.
TraesCS7A01G129700	Pre-mRNA-processing-splicing factor 8	Soller M, White K. ELAV inhibits 3′-end processing to promote neural splicing of ewg pre-mRNA[J]. Genes & development, 2003, 17(20): 2526-2538.
TraesCS7A01G129800	AP-1 complex subunit gamma-2	White U A, Stephens J M. Transcriptional factors that promote formation of white adipose tissue[J]. Molecular and cellular endocrinology, 2010, 318(1-2): 10-14.
TraesCS7A01G129900	RING finger protein	Hu H M, O'Rourke K, Boguski M S, et al. A novel RING finger protein interacts with the cytoplasmic domain of CD40[J]. Journal of Biological Chemistry, 1994, 269(48): 30069-30072.
TraesCS7A01G130000	Alkyl transferase	Pegg A E, Boosalis M, Samson L, et al. Mechanism of inactivation of human O6-alkylguanine-DNA alkyltransferase by O6-benzylguanine[J]. Biochemistry, 1993, 32(45): 11998-12006.
TraesCS7A01G130100	Protein kinase-like protein	Okada T, Yoshida H, Akazawa R, et al. Distinct roles of activating transcription factor 6 (ATF6) and double-stranded RNA-activated protein kinase-like endoplasmic reticulum kinase (PERK) in transcription during the mammalian unfolded protein response[J]. Biochemical Journal, 2002, 366(2): 585-594.
TraesCS7A01G130300	Protein DETOXIFICATION	Demirevska-Kepova K, Simova-Stoilova L, Stoyanova Z P, et al. Cadmium stress in barley: growth, leaf pigment, and protein composition and detoxification of reactive oxygen species[J]. Journal of plant nutrition, 2006, 29(3): 451-468.
TraesCS7A01G130400	Leucine-rich repeat receptor-like protein kinase	Komjanc M, Festi S, Rizzotti L, et al. A leucine-rich repeat receptor-like protein kinase (LRPKm1) gene is induced in Malus× domestica by Venturia inaequalis infection and salicylic acid treatment[J]. Plant molecular biology, 1999, 40(6): 945-957.
TraesCS7A01G130500	Proteasome subunit alpha type	Li N, Zhang Z, Zhang W, et al. Calcineurin B subunit interacts with proteasome subunit alpha type 7 and represses hypoxia-inducible factor-1α activity via the proteasome pathway[J]. Biochemical and biophysical research communications, 2011, 405(3): 468-472.
