# Supplementary material for: Identification of quantitative trait loci for kernel traits in a wheat cultivar Chuannong16
Source: BMC Genet. 2019 Oct 16;20:77. doi: 10.1186/s12863-019-0782-4 (PMC6796374; doi:10.1186/s12863-019-0782-4)
Supplement: Supplementary file 8 — Additional file 8: Table S7. QTL mapping for plant height (PH), anthesis date (AD), and spikelet number per spike (SNS) on chromosome 2D. [file 12863_2019_782_MOESM8_ESM.xlsx]

## Sheet: Table S7
Table S7 QTL mapping for plant height (PH), anthesis date (AD),and spikelet number per spike (SNS) on chromosome 2D
Trait	Environment	Chromosome	Flanking markers	LOD	PVE(%)	Add
plant height	2017CZ	2D	AX-111956072 and AX-109422526	7.0975	4.7783	3.7013
	2017YA	2D	AX-109422526 and AX-110072786	5.0487	7.9331	3.6247
	2018YA	2D	AX-109422526 and AX-110072786	7.9266	12.6966	4.587
spikelet number per spike	2018YA	2D	AX-111096297 and KASP-AX-94721936	16.68	31.13	1.41
	2017CZ	2D	AX-86171316 and AX-111956072	27.06	40.75	1.51
	2017YA	2D	AX-86171316 and AX-111956072	30.99	45.68	2.11
anthesis stage	2018CZ	2D	AX-111096297 and KASP-AX-94721936	30.1291	46.888	3.7152
	2017WJ	2D	AX-111956072 and AX-109422526	47.0859	62.7041	5.4366
	2017CZ	2D	AX-111956072 and AX-109422526	38.3629	55.0335	4.5139
	2018WJ	2D	AX-111956072 and AX-109422526	46.7866	29.0413	3.3266
