# Supplementary material for: Identification of quantitative trait loci for kernel traits in a wheat cultivar Chuannong16
Source: BMC Genet. 2019 Oct 16;20:77. doi: 10.1186/s12863-019-0782-4 (PMC6796374; doi:10.1186/s12863-019-0782-4)
Supplement: Supplementary file 9 — Additional file 9: Table S8. Details of investigated traits in different environments. [file 12863_2019_782_MOESM9_ESM.xlsx]

## Sheet: Sheet1
Table S8 Details of investigated traits in different environments
Traits	Environment
KL	2017CZ	2017YA	2018YA
KW	2017CZ	2017YA	2018YA
TKW	2017CZ	2017YA	2018YA
Spikelet Number Per Spike	2017CZ	2017YA	2018YA
Spike Length	2017CZ	2017YA	2018YA
Plant Height	2017CZ	2017YA	2018YA
Productive Tiller Number	2017WJ	2017YA	2018WJ	2018CZ
Anthesis Stage	2017WJ	2017CZ	2018WJ	2018CZ
